# Supplementary material for: Rhodium-catalyzed redox-neutral coupling of phenidones with alkynes
Source: Royal Society of Chemistry journal article supplement (doi:10.1039/c7ob01271c), 2017-01-01
Supplement: c7ob01271c1.pdf [file c7ob01271c1.pdf]

*Supporting Information for*

**Rhodium-Catalyzed Redox-Neutral Coupling of  
Phenidones with Alkynes**

Zhoulong Fan,<sup>a,b,+</sup> Heng Lu,<sup>c,+</sup> Wei Li,<sup>a</sup> Kaijun Geng,<sup>a,b</sup> and Ao Zhang<sup>\*a,b,c</sup>

<sup>a</sup> CAS Key Laboratory of Receptor Research, and the State Key Laboratory of Drug Research,  
Shanghai Institute of Materia Medica (SIMM), Chinese Academy of Sciences, Shanghai 201203,  
China.

E-mail: aozhang@simm.ac.cn

<sup>b</sup> University of Chinese Academy of Sciences, Beijing 100049, China

<sup>c</sup> ShanghaiTech University, Shanghai 201210, China

<sup>+</sup> These two authors contributed equally to this work

## Table of Contents

|                                                |     |
|------------------------------------------------|-----|
| <b>1. Copies of NMR spectra data</b> -----     | S1  |
| <b>2. X-ray structure of compound 3a</b> ----- | S35 |

# 1. Copies of NMR spectra data

## $^1\text{H}$ and $^{13}\text{C}$ NMR spectra of compound 3a

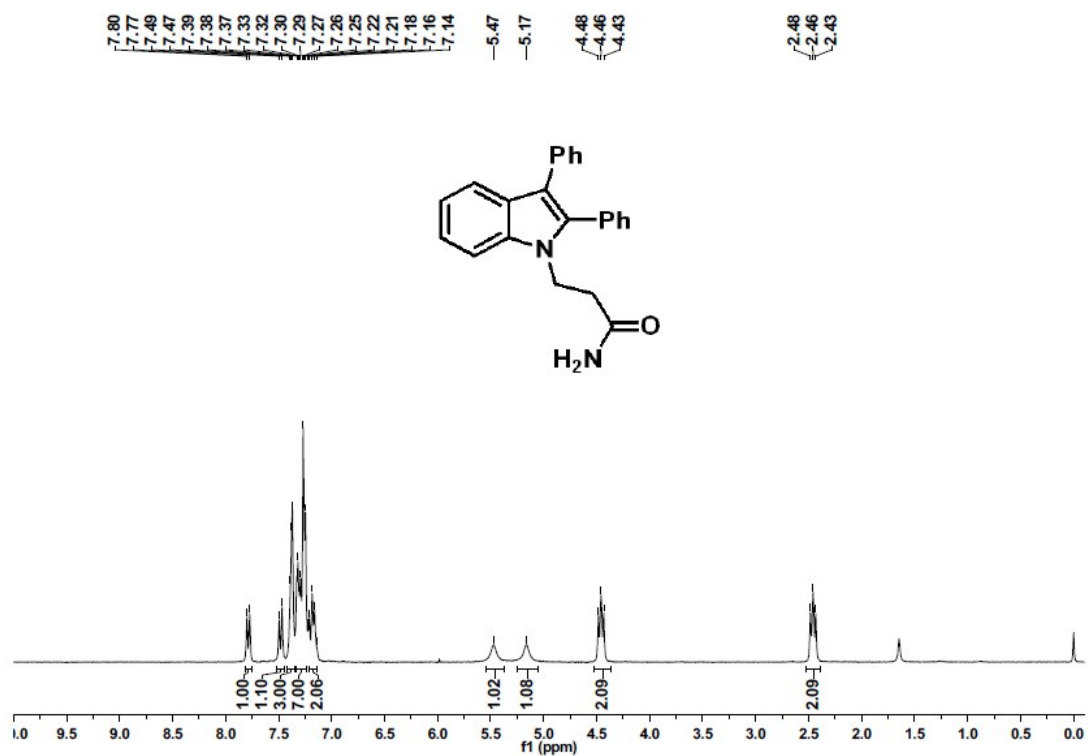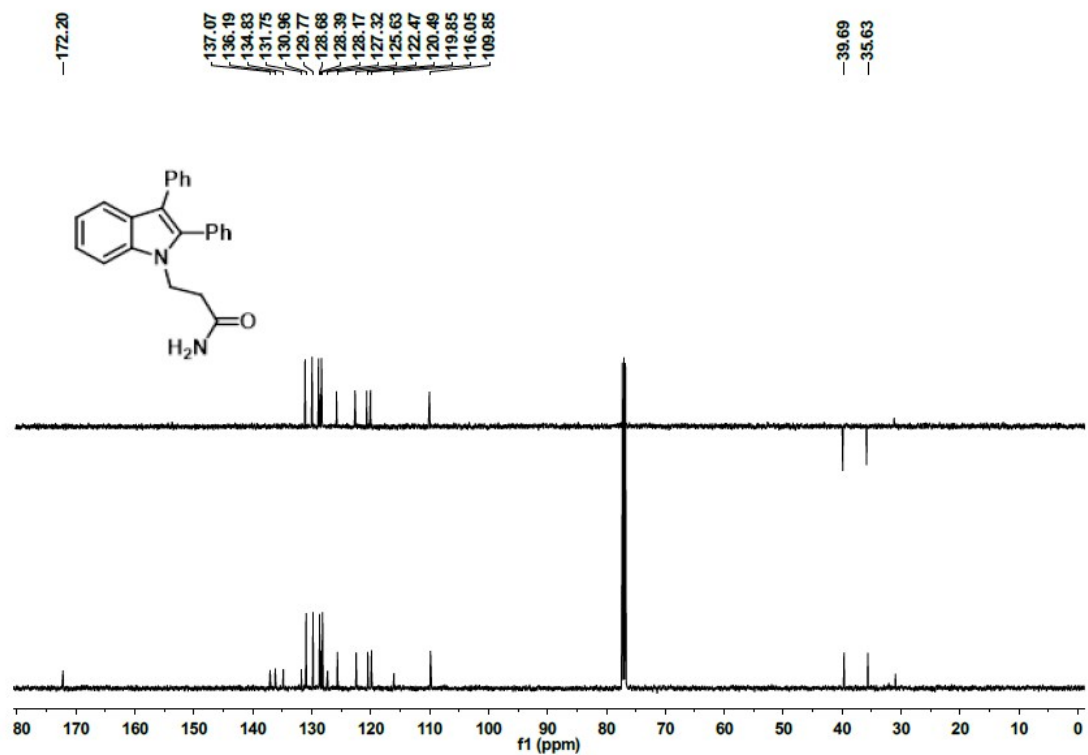

### $^1\text{H}$ and $^{13}\text{C}$ NMR spectra of compound 3b

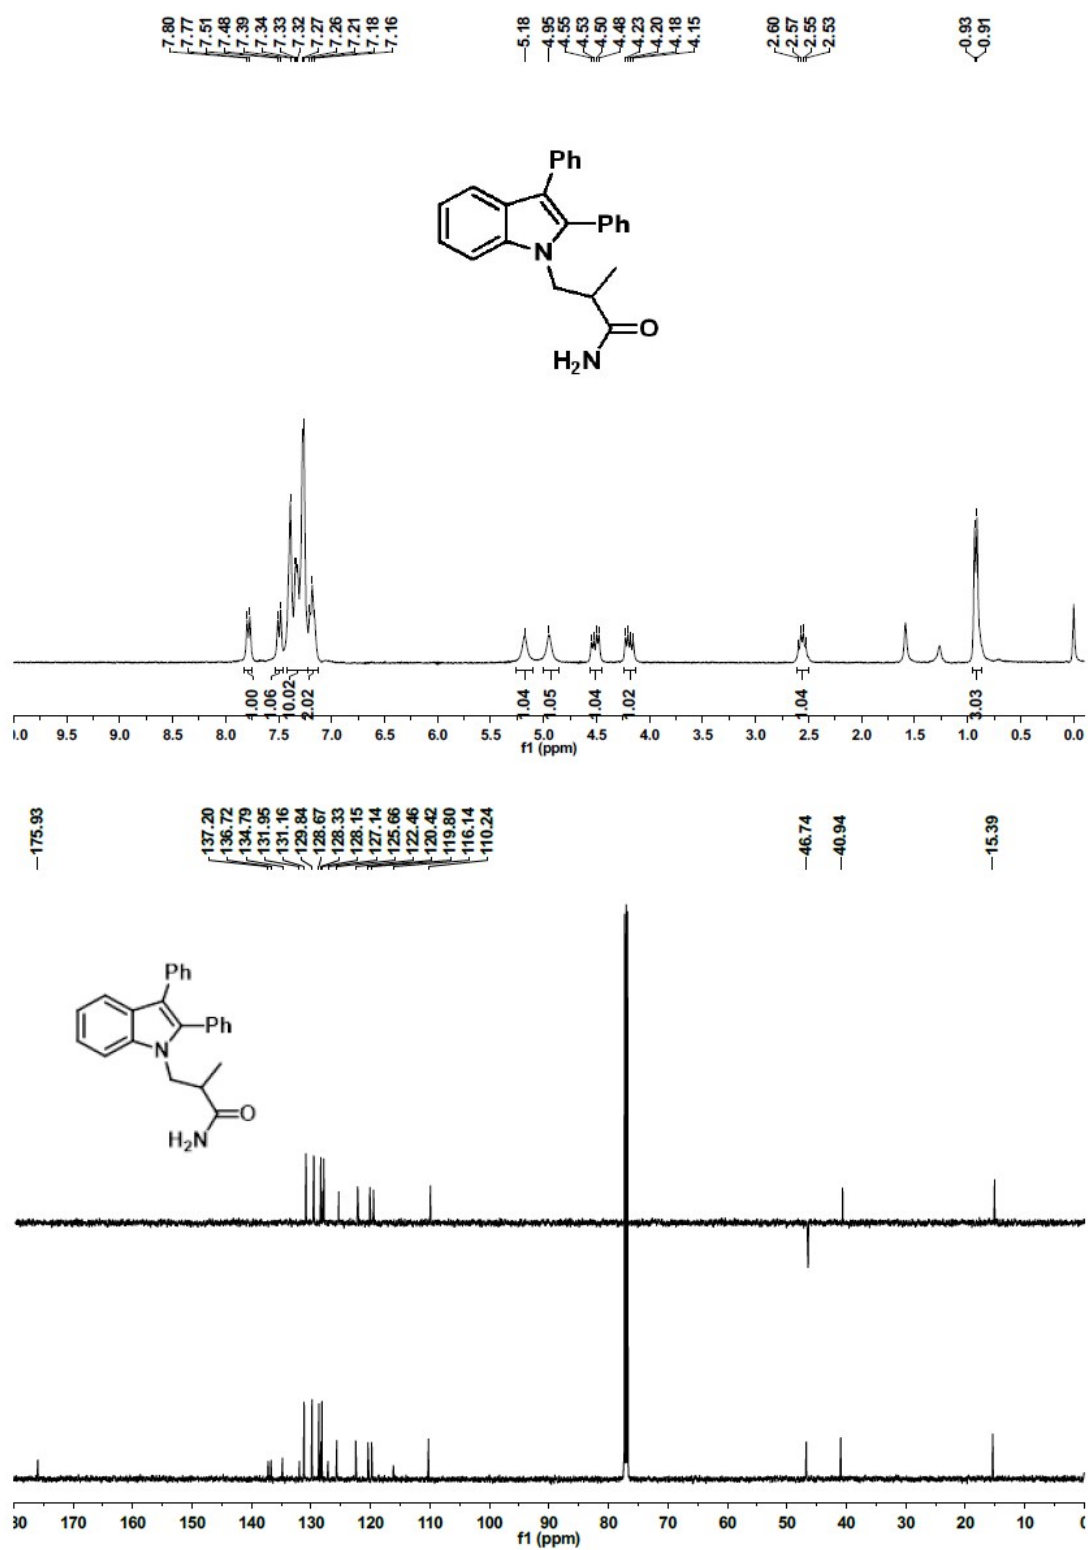

# <sup>1</sup>H and <sup>13</sup>C NMR spectra of compound 3c

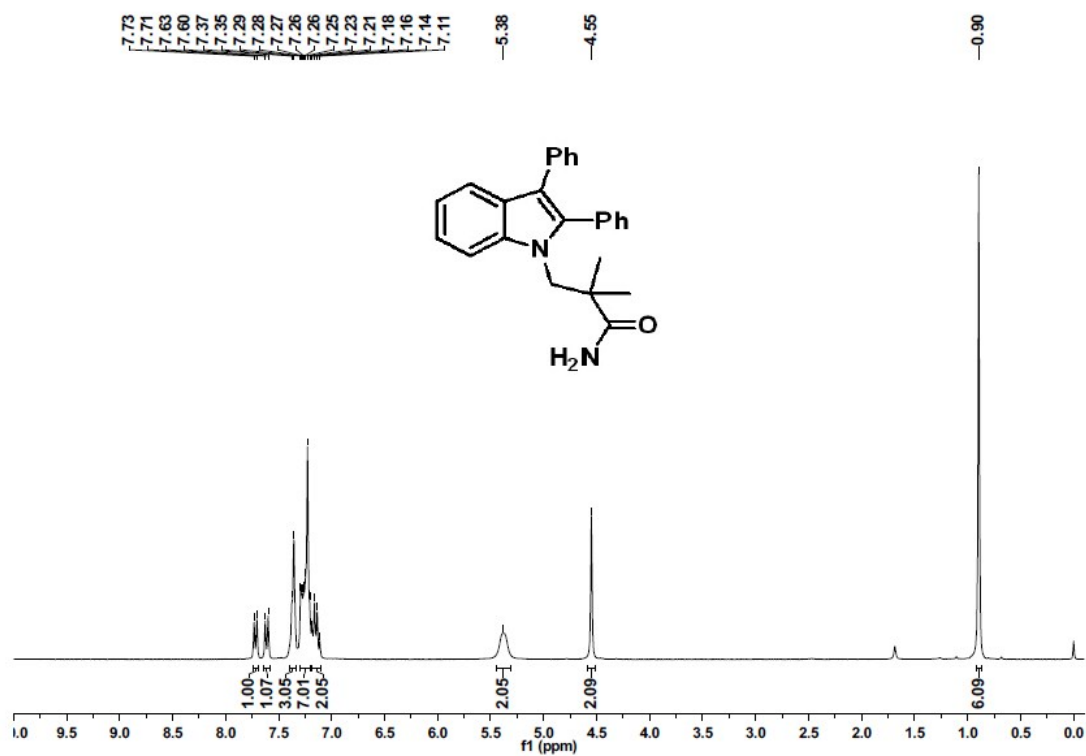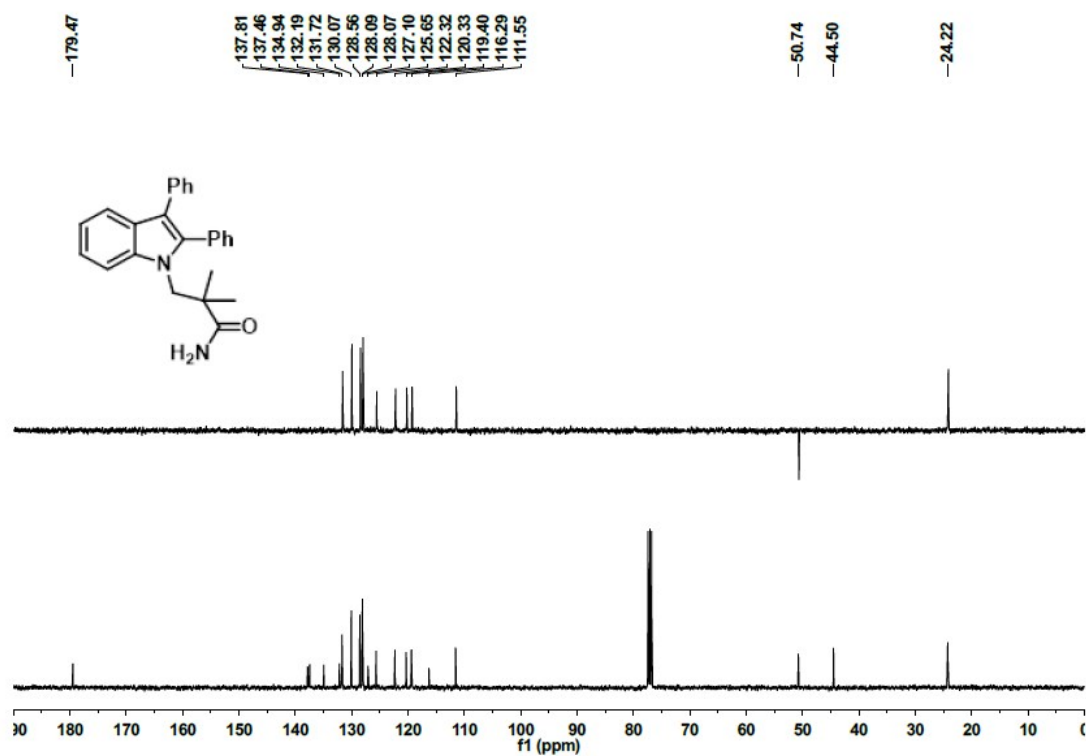

# <sup>1</sup>H and <sup>13</sup>C NMR spectra of compound 3d

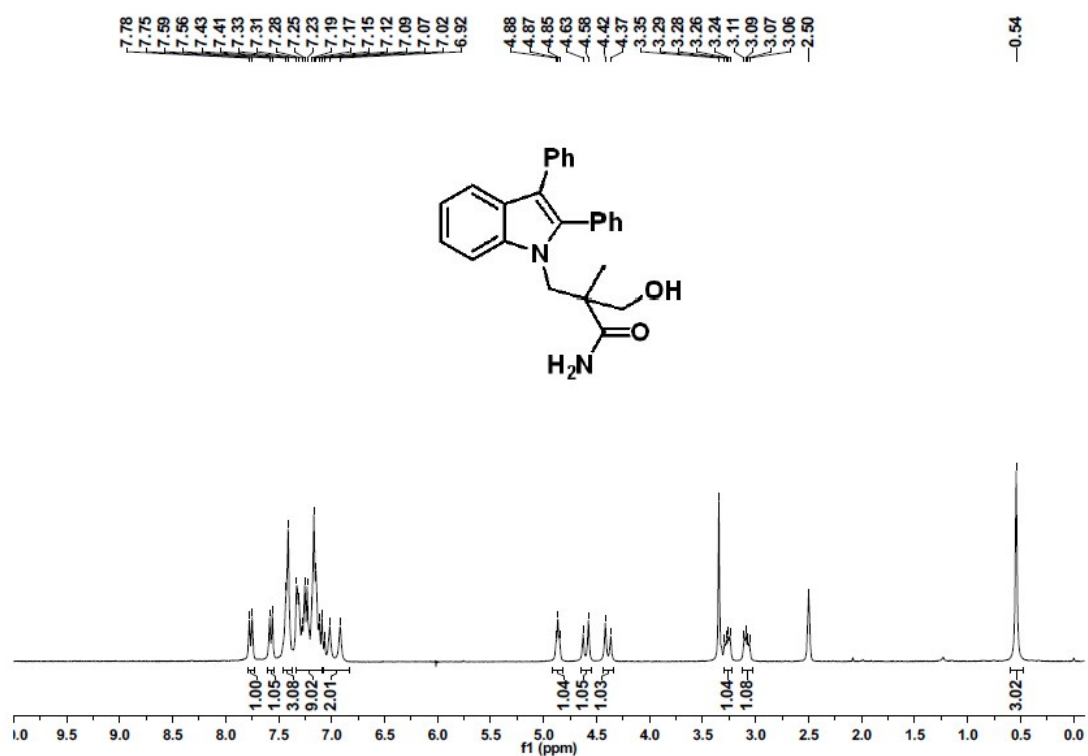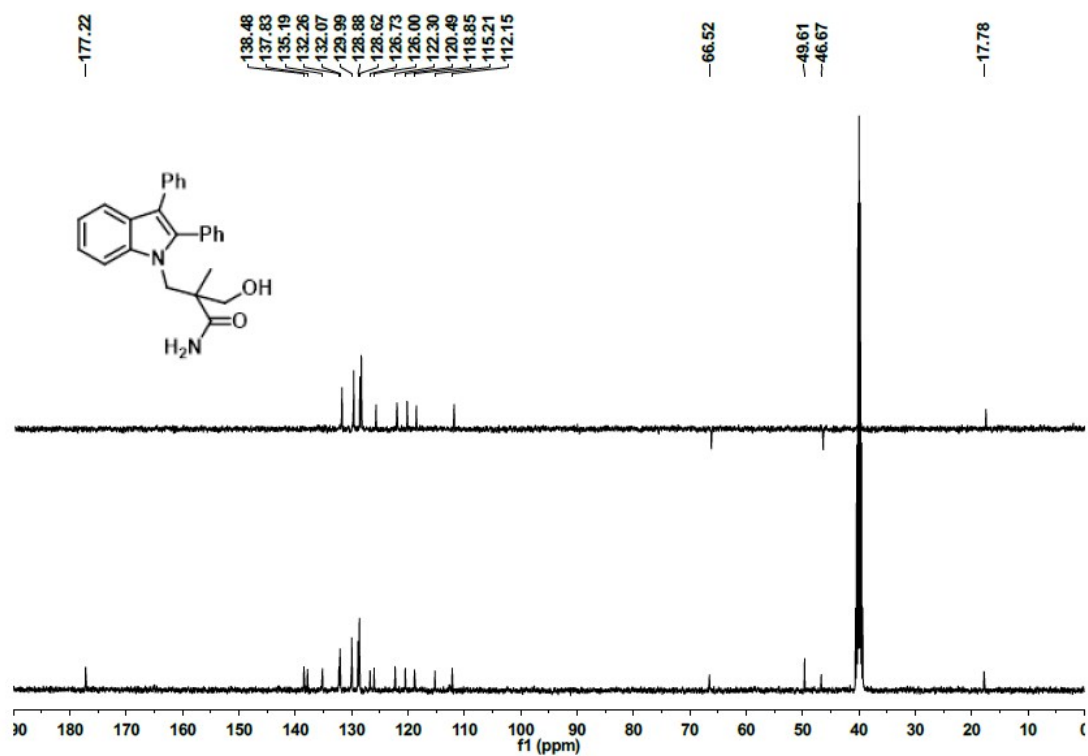

<sup>1</sup>H and <sup>13</sup>C NMR spectra of compound 3e

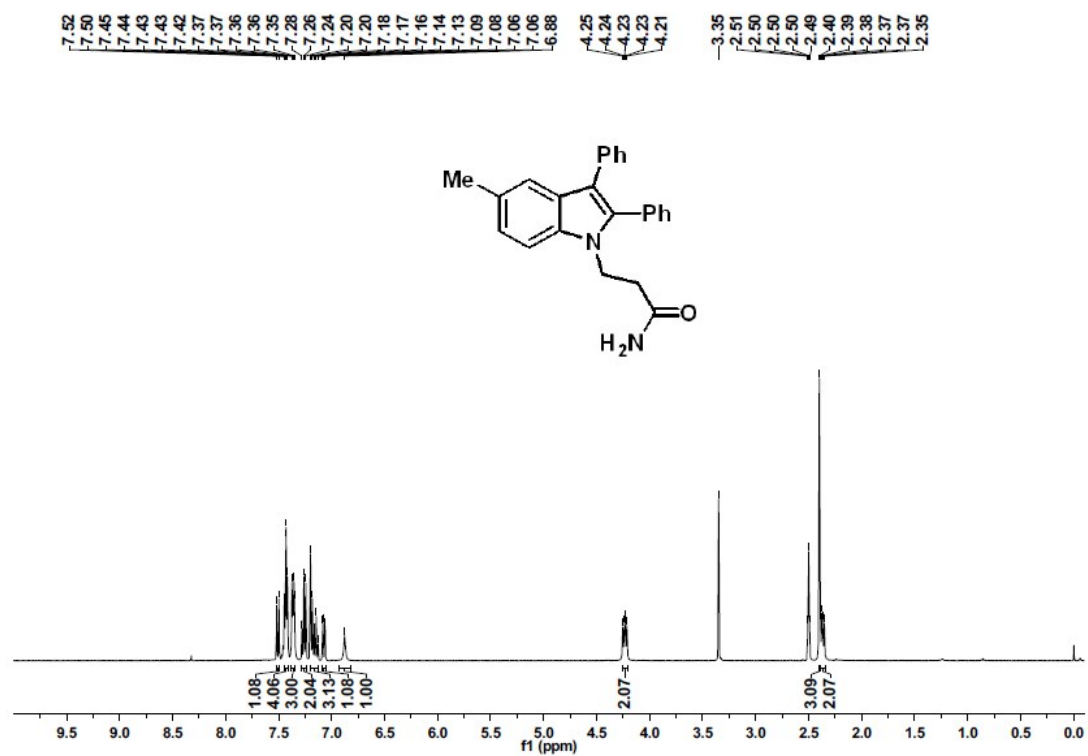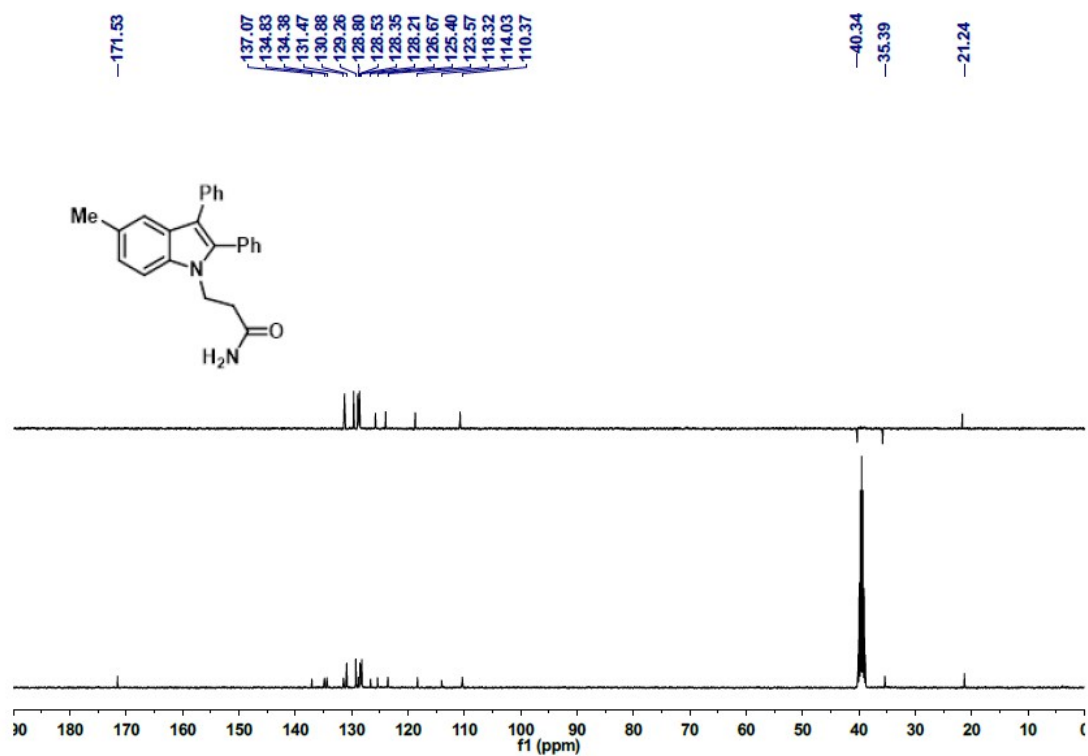

# <sup>1</sup>H and <sup>13</sup>C NMR spectra of compound 3f

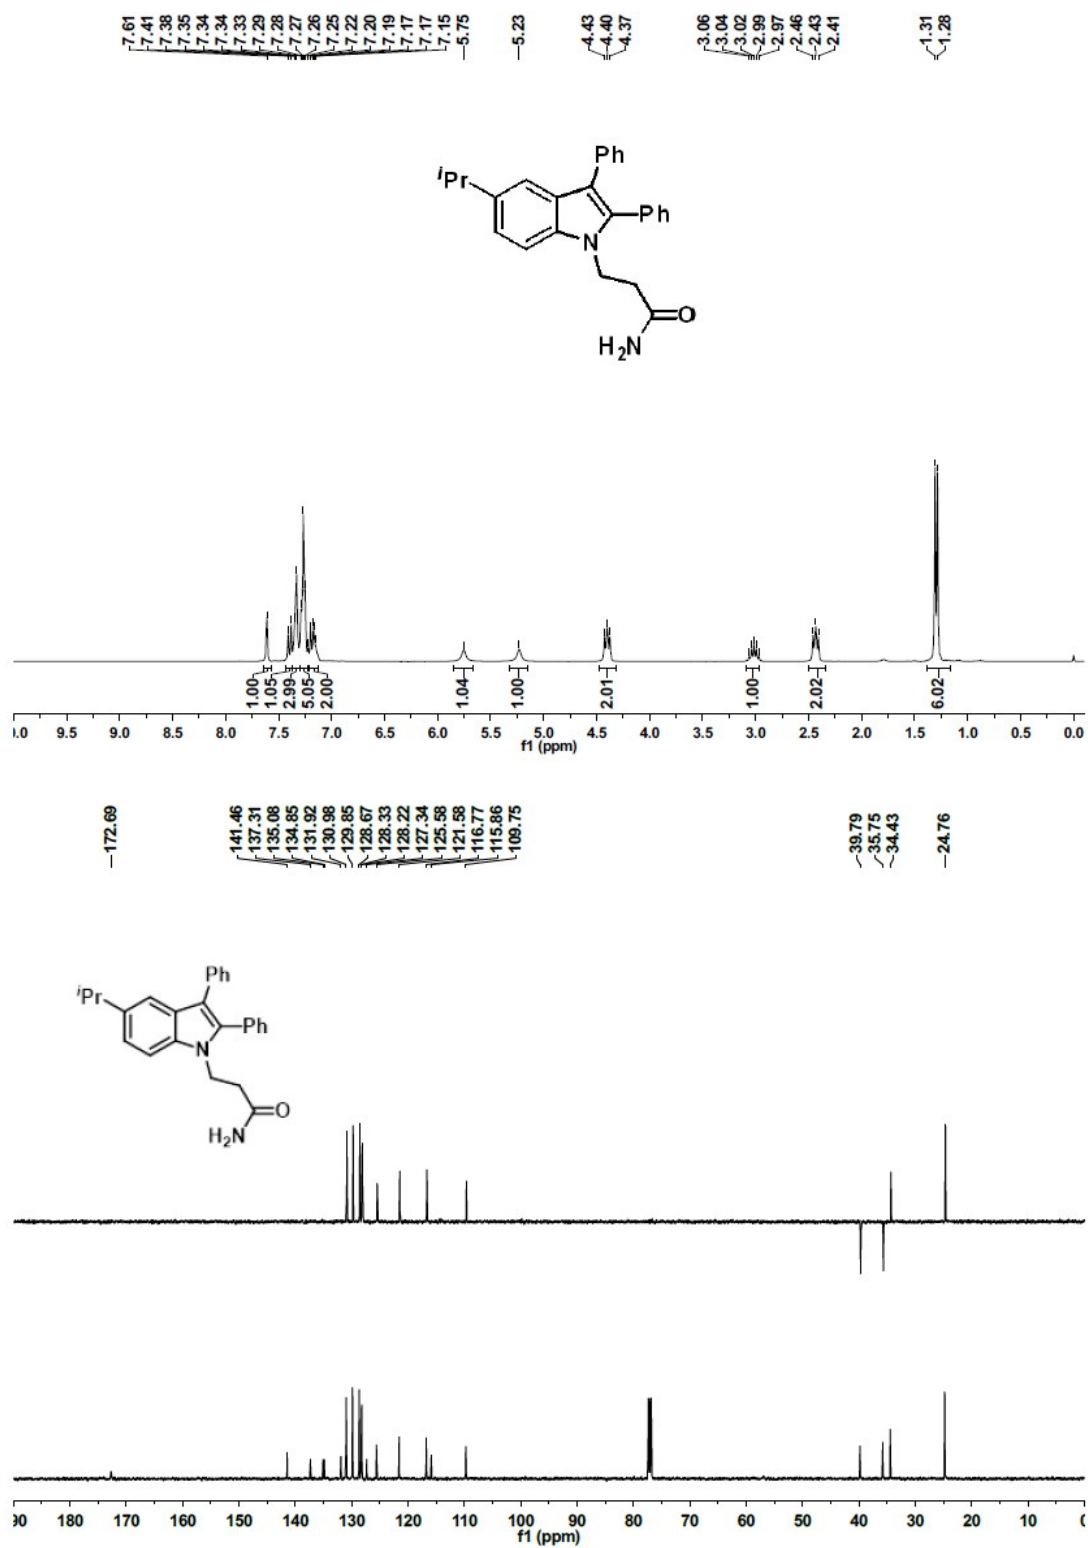



# $^1\text{H}$ and $^{13}\text{C}$ NMR spectra of compound 3g

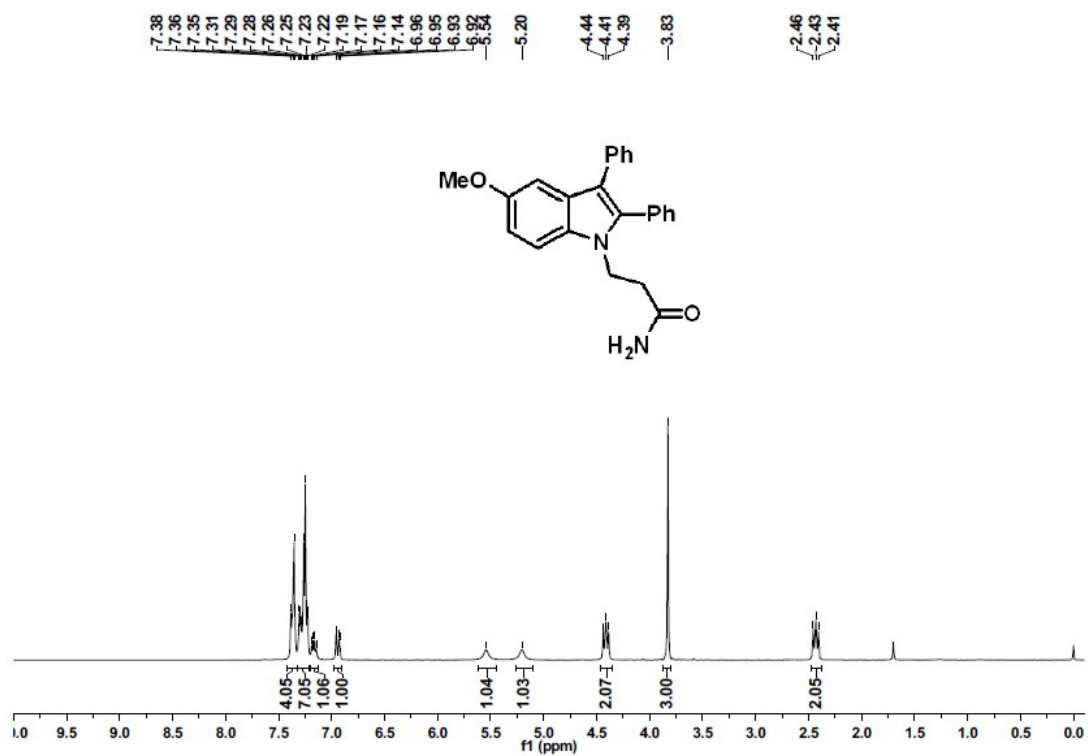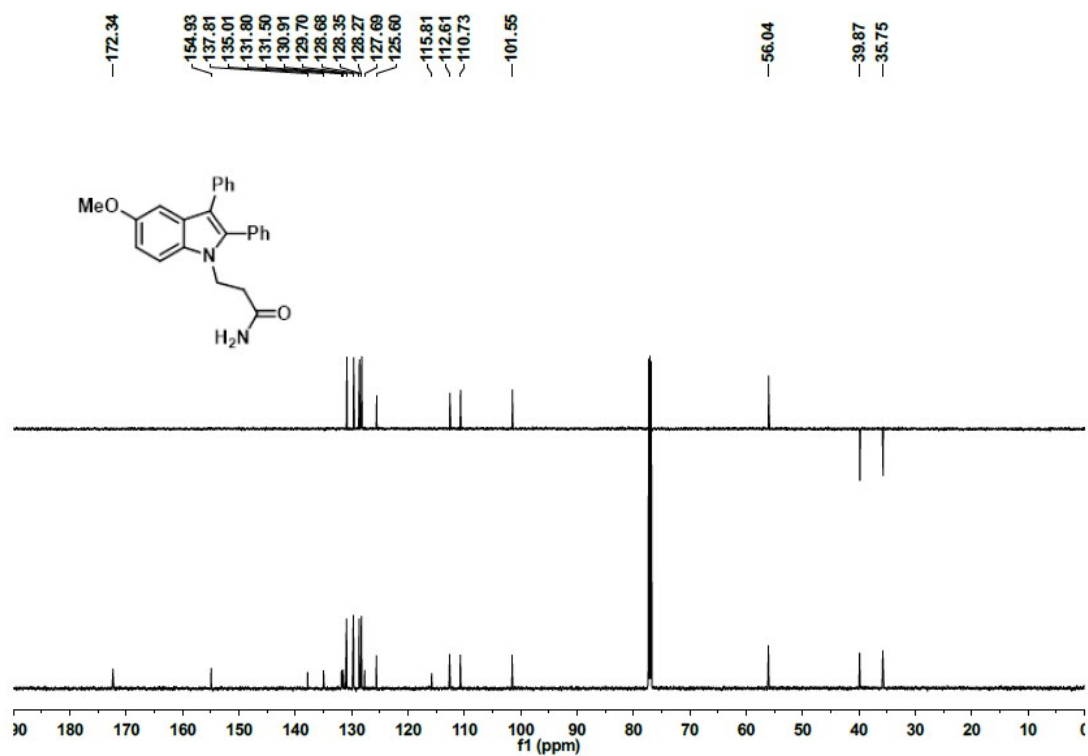

# <sup>1</sup>H and <sup>13</sup>C NMR spectra of compound 3h

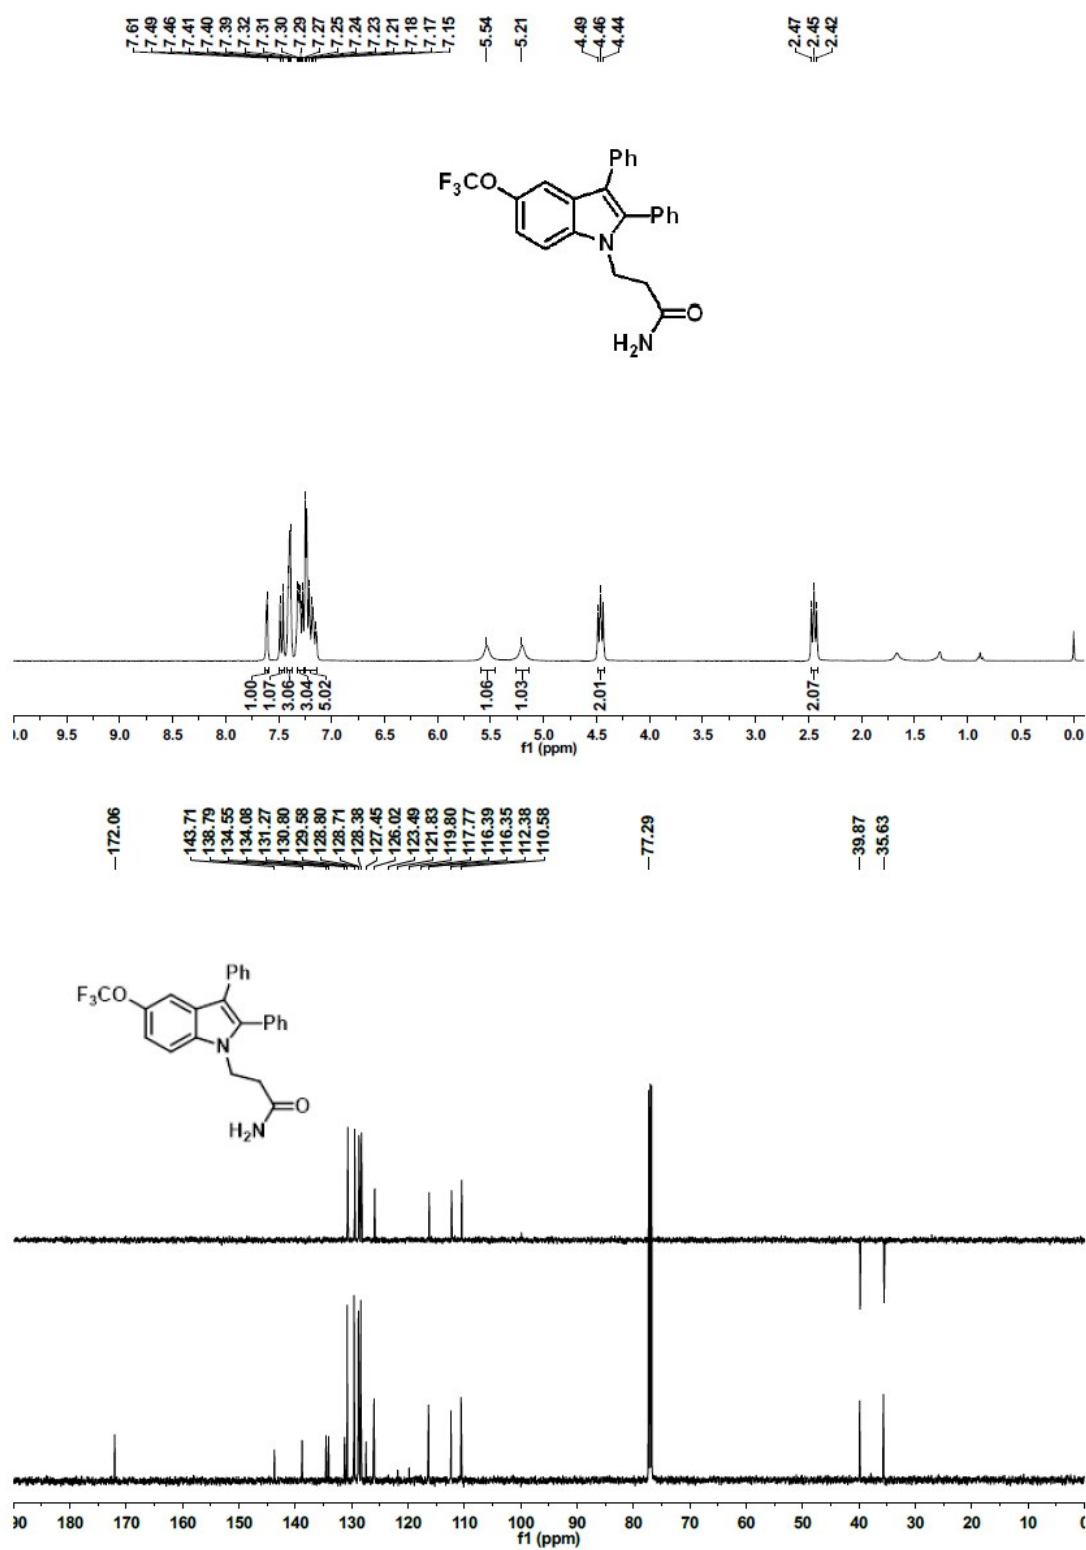

# <sup>1</sup>H and <sup>13</sup>C NMR spectra of compound 3i

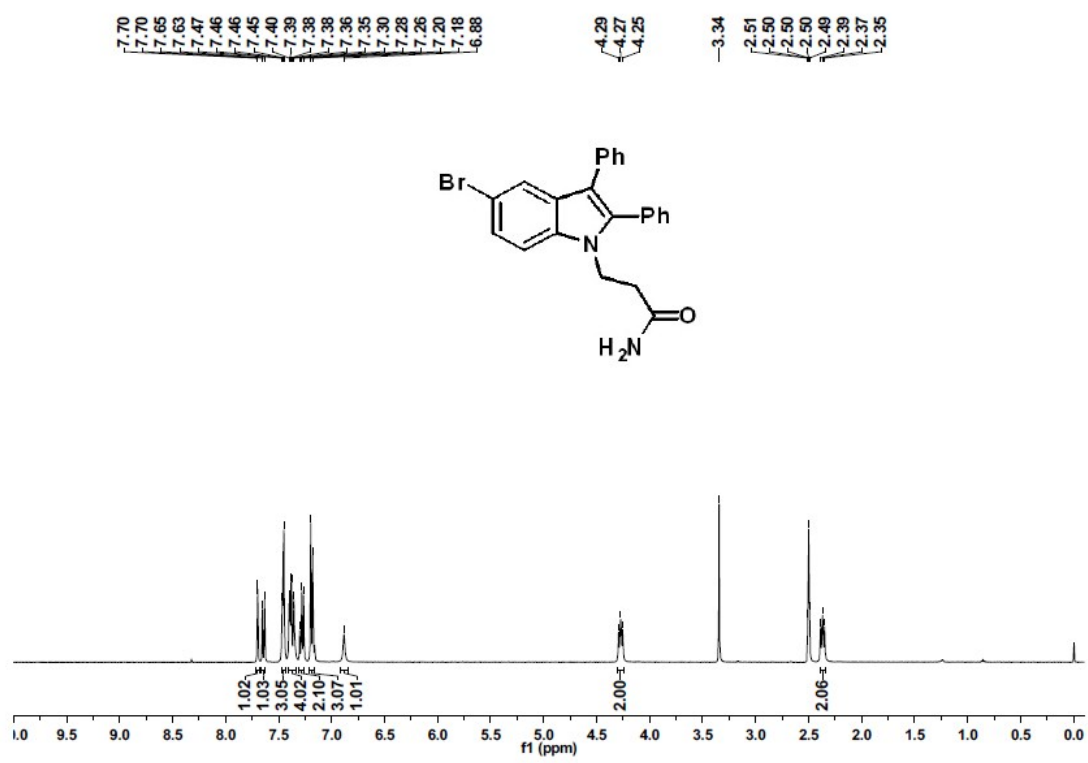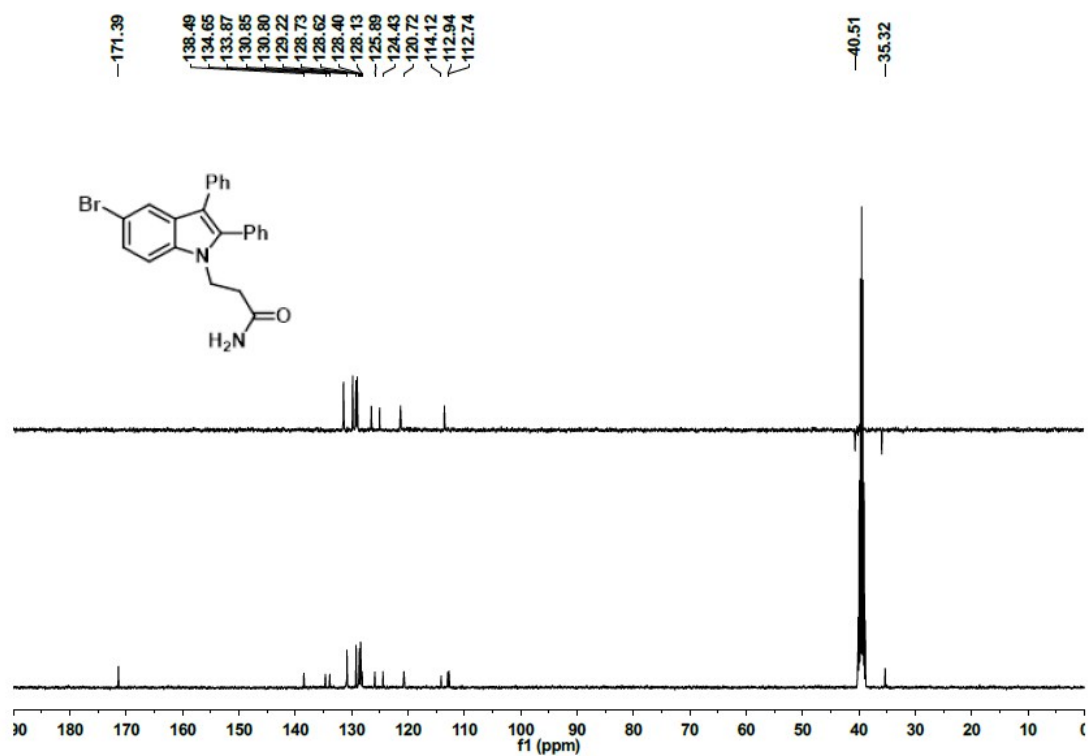

# <sup>1</sup>H and <sup>13</sup>C NMR spectra of compound 3j

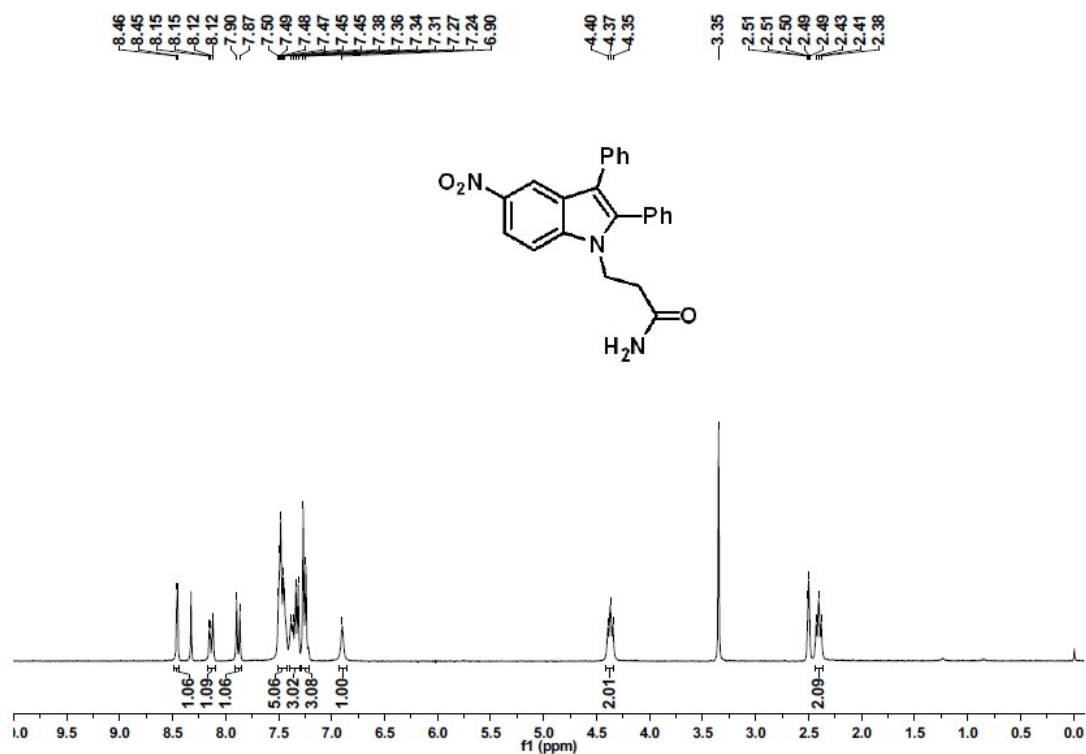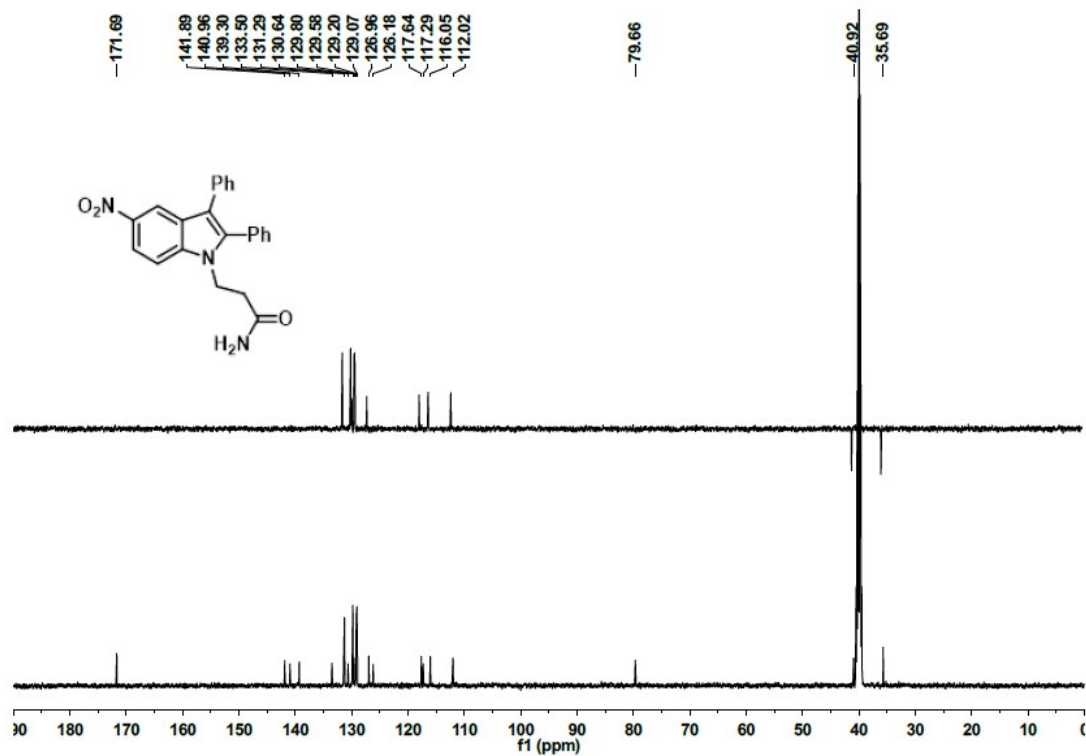

# <sup>1</sup>H and <sup>13</sup>C NMR spectra of compound 3k

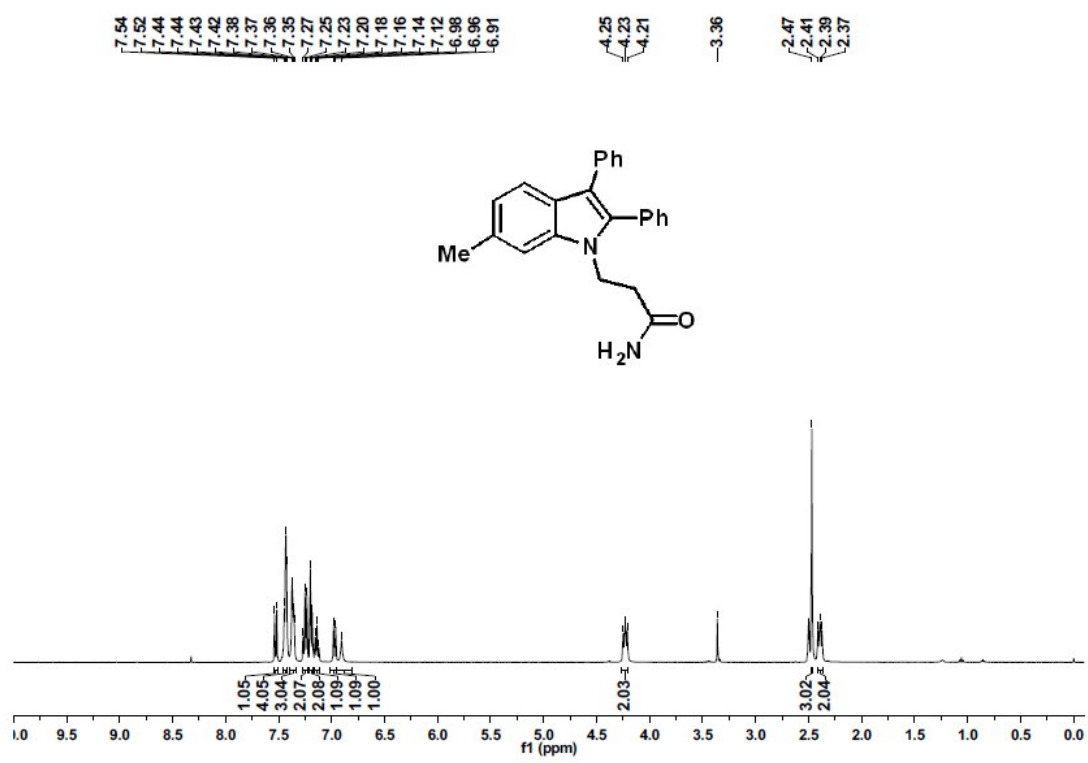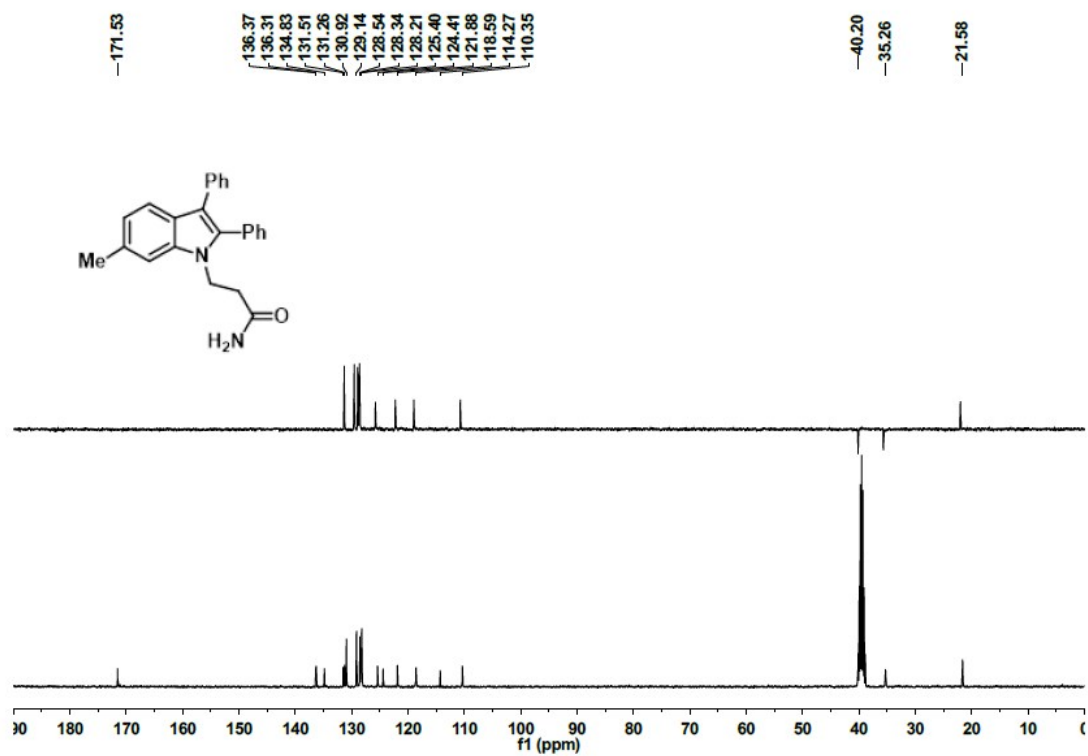

# <sup>1</sup>H and <sup>13</sup>C NMR spectra of compound 3I

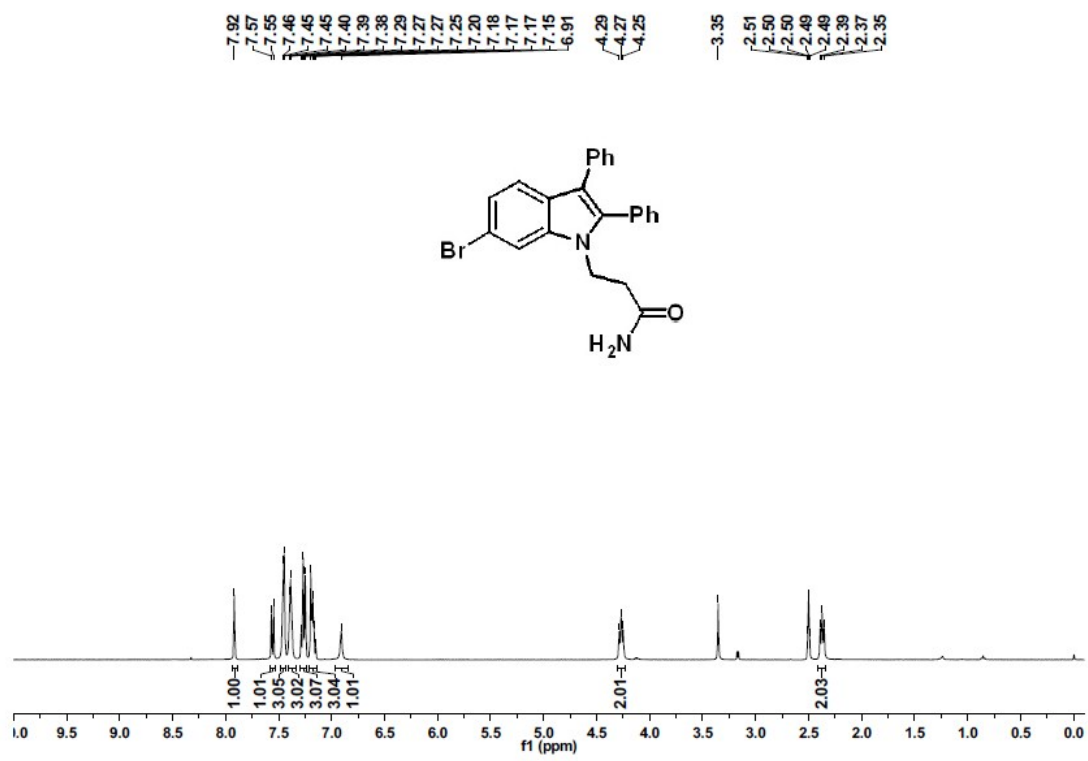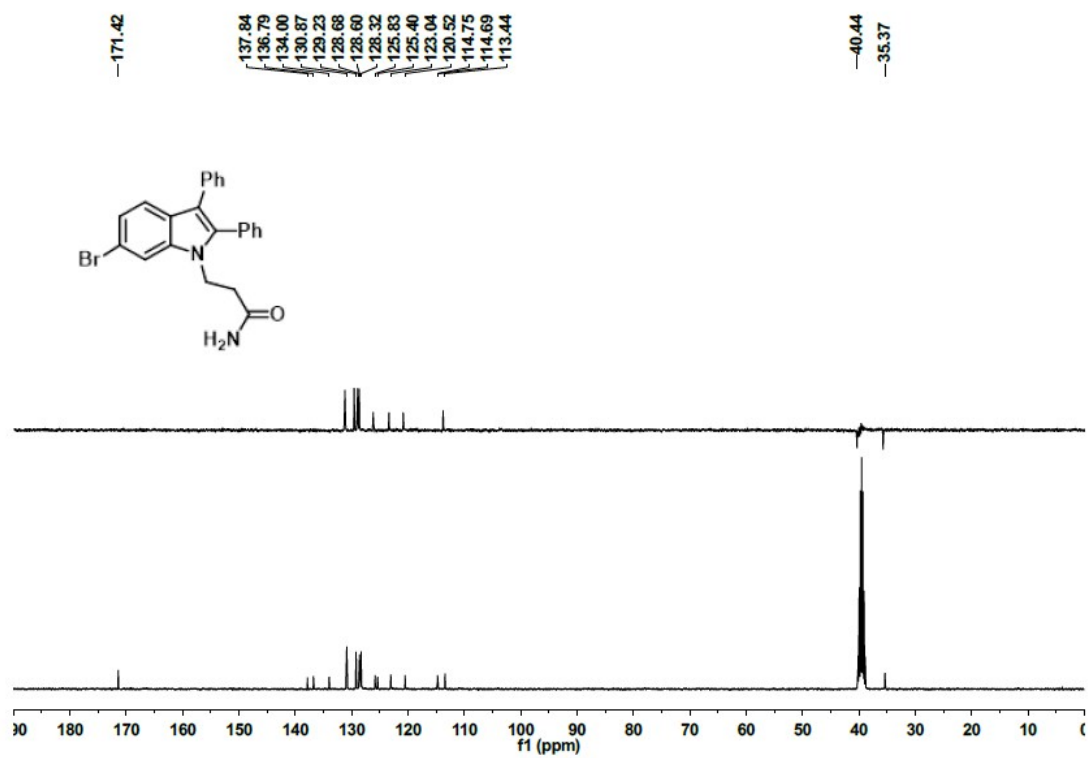

# <sup>1</sup>H and <sup>13</sup>C NMR spectra of compound 3m

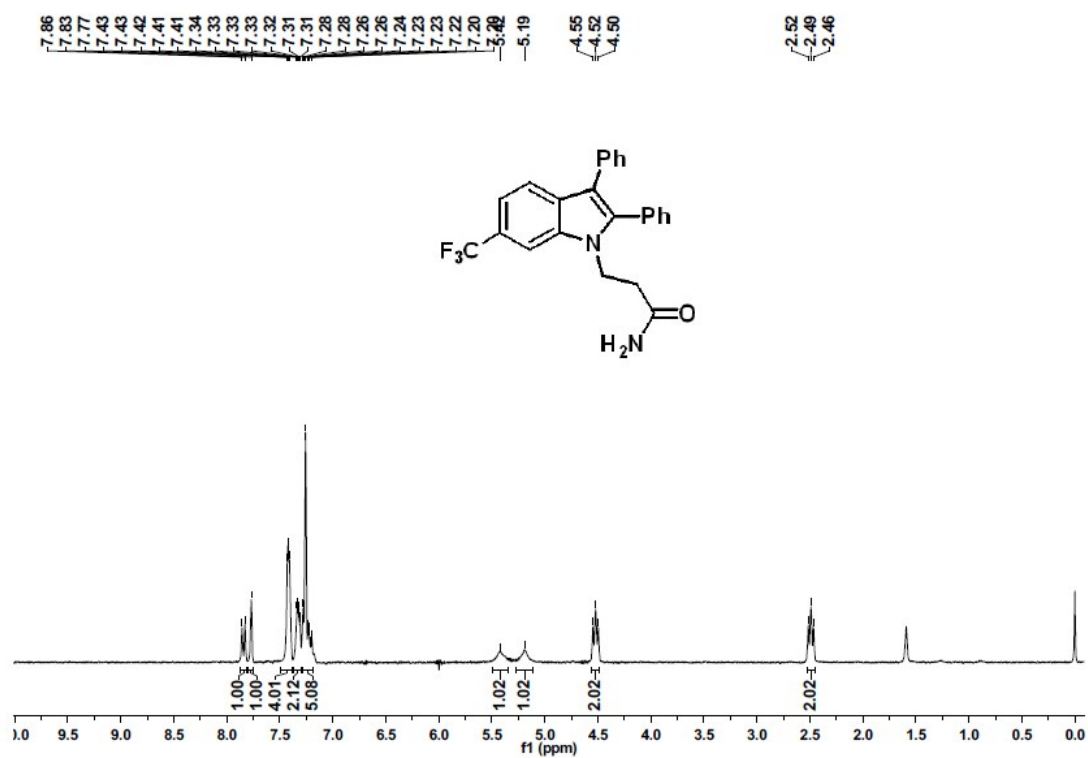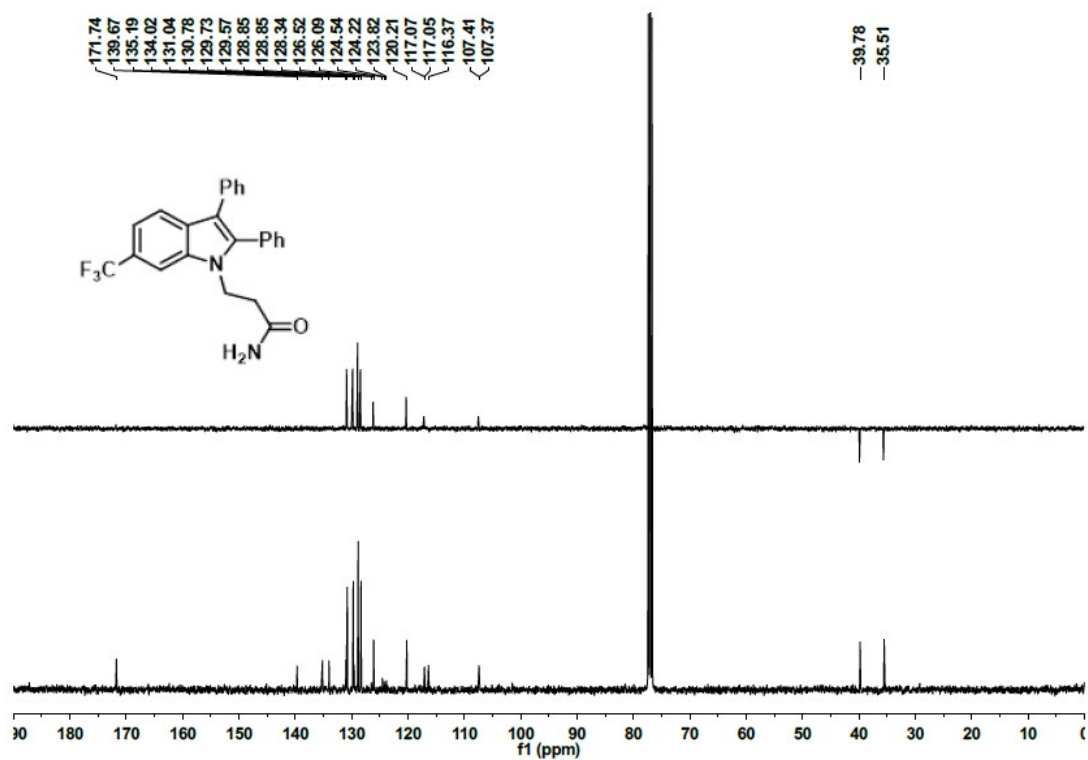

### <sup>1</sup>H and <sup>13</sup>C NMR spectra of compound 3n

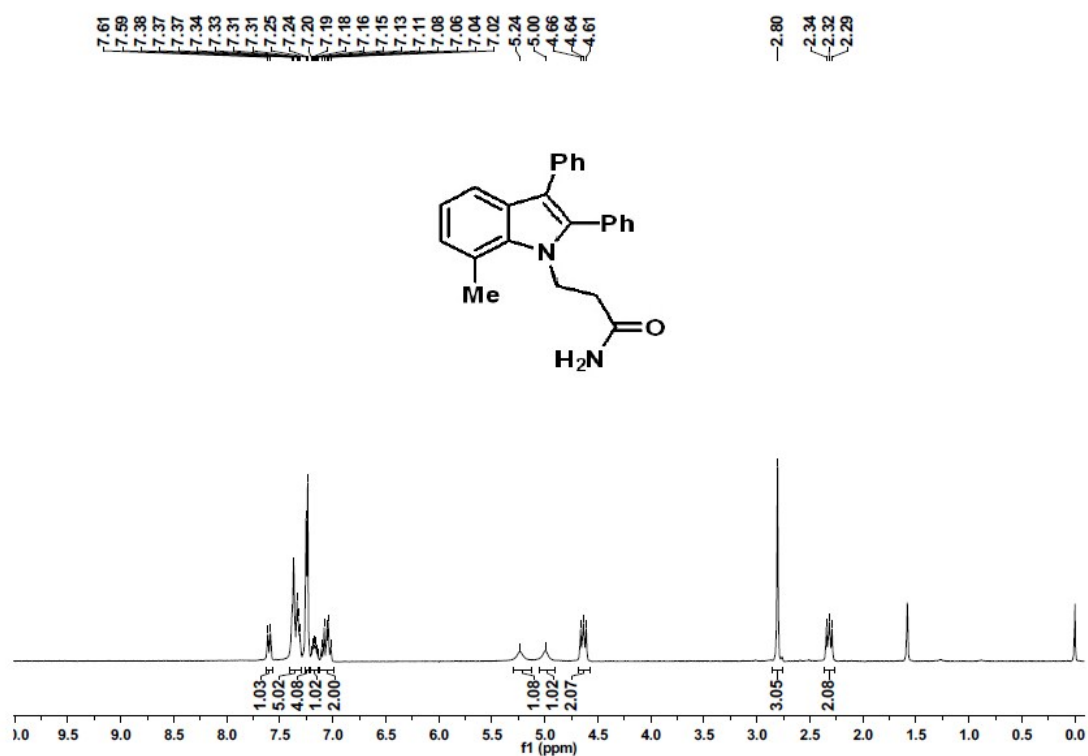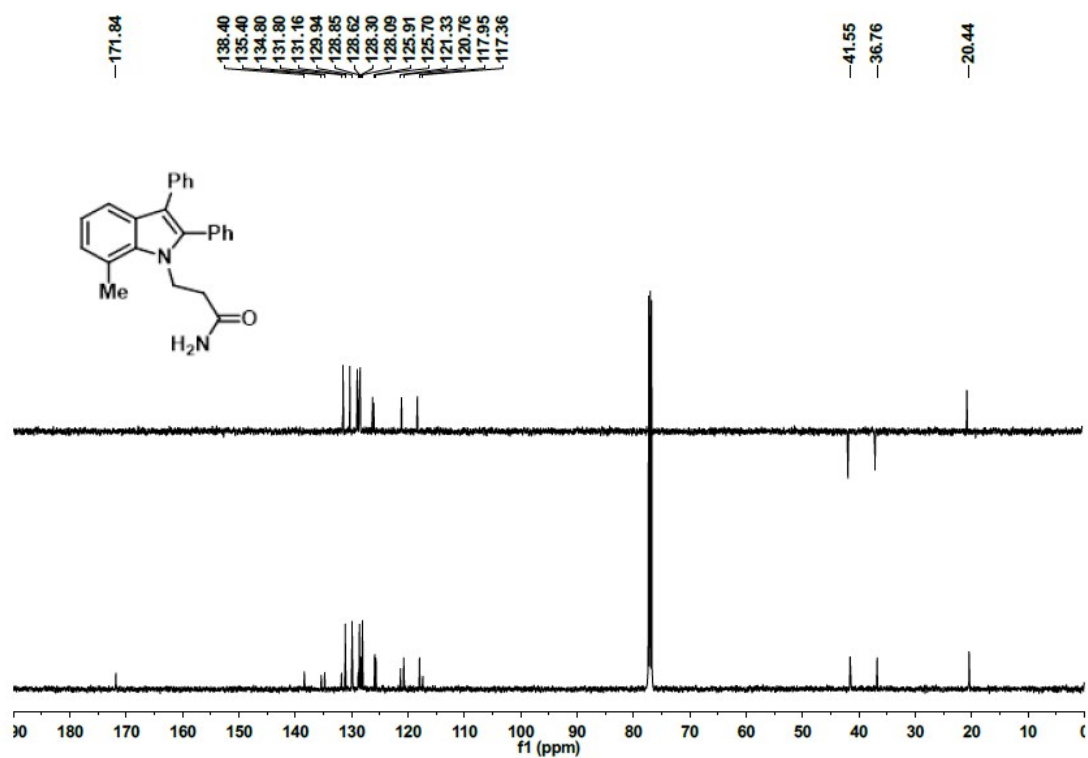



# <sup>1</sup>H and <sup>13</sup>C NMR spectra of compound 3o

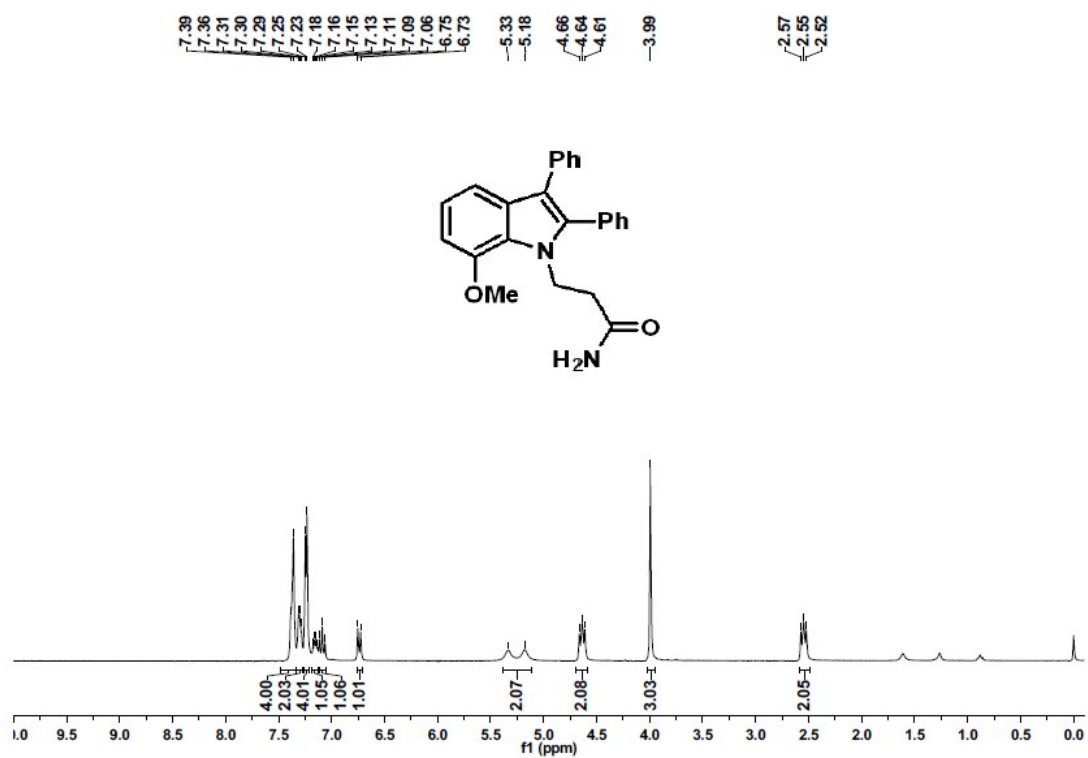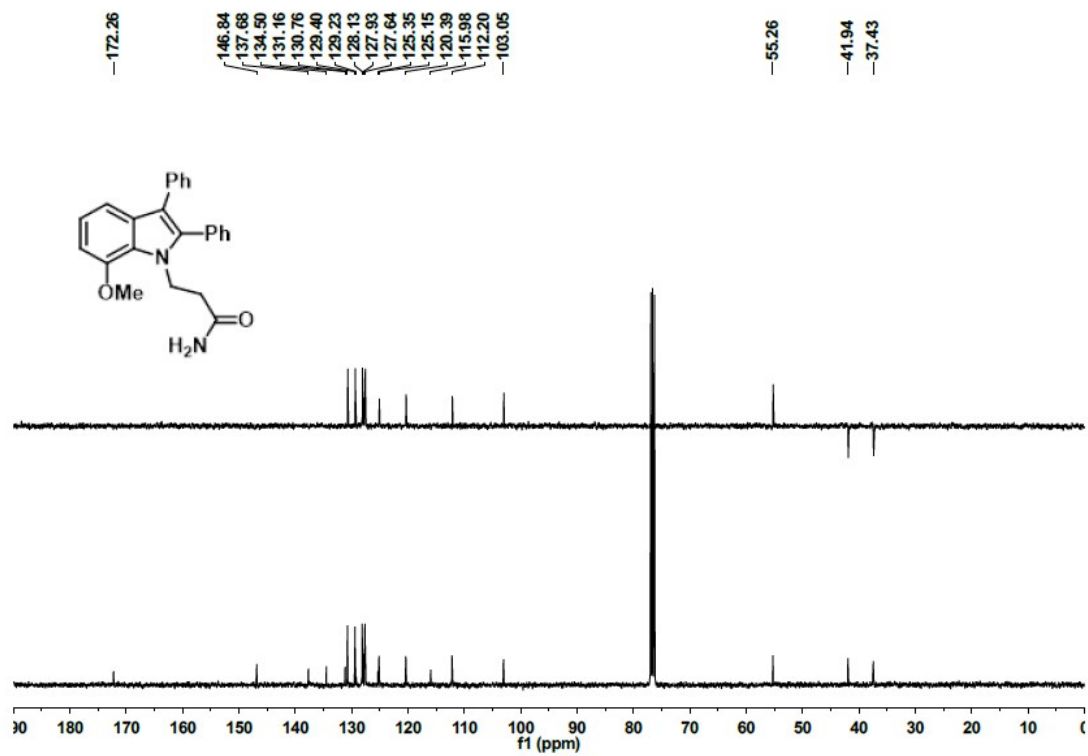

**$^1\text{H}$  and  $^{13}\text{C}$  NMR spectra of compound 3p**

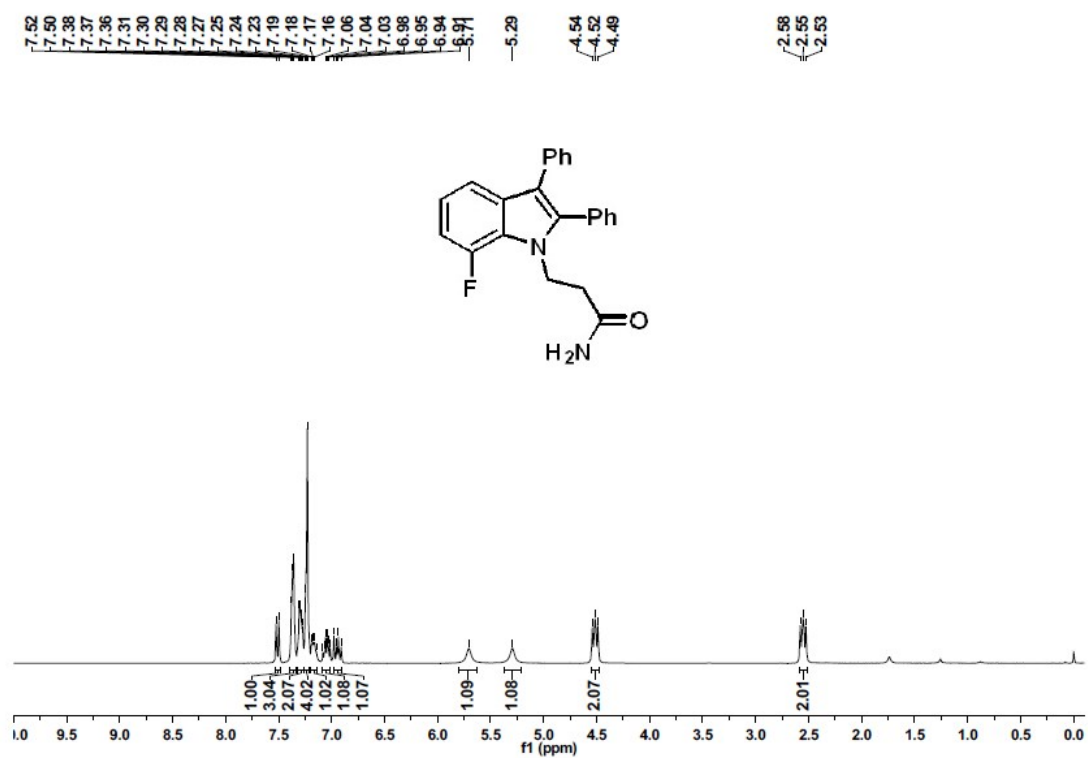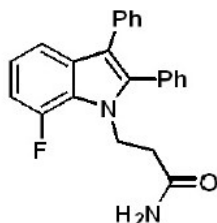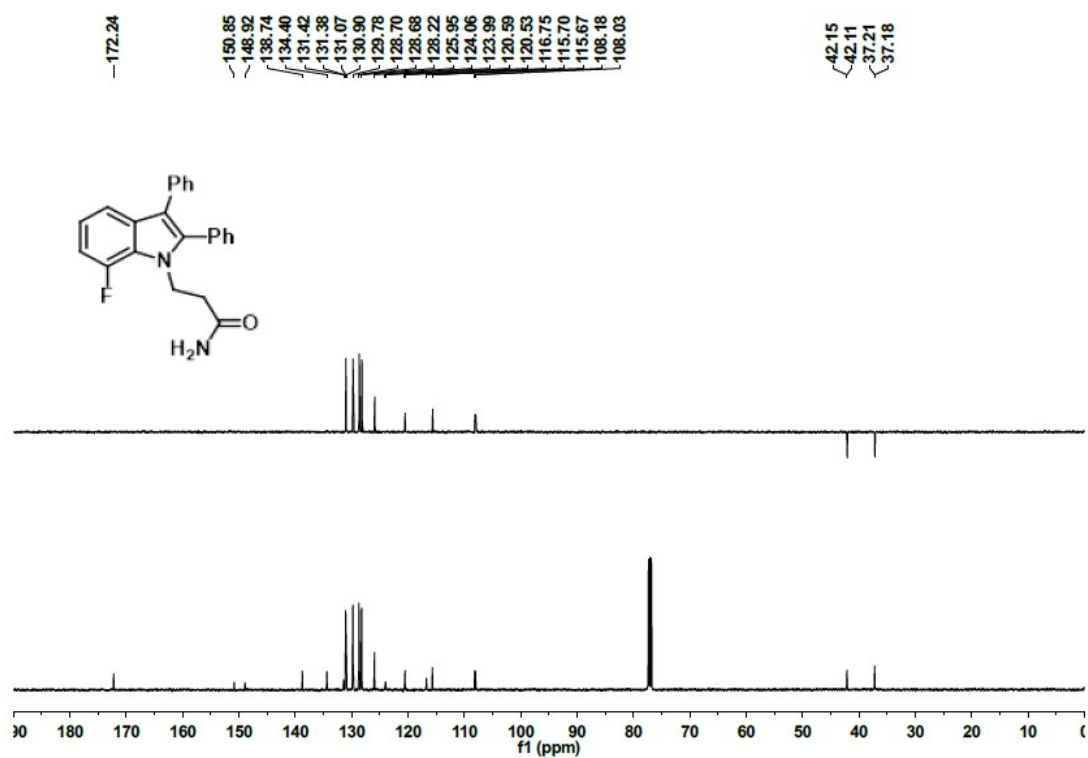

# <sup>1</sup>H and <sup>13</sup>C NMR spectra of compound 3q

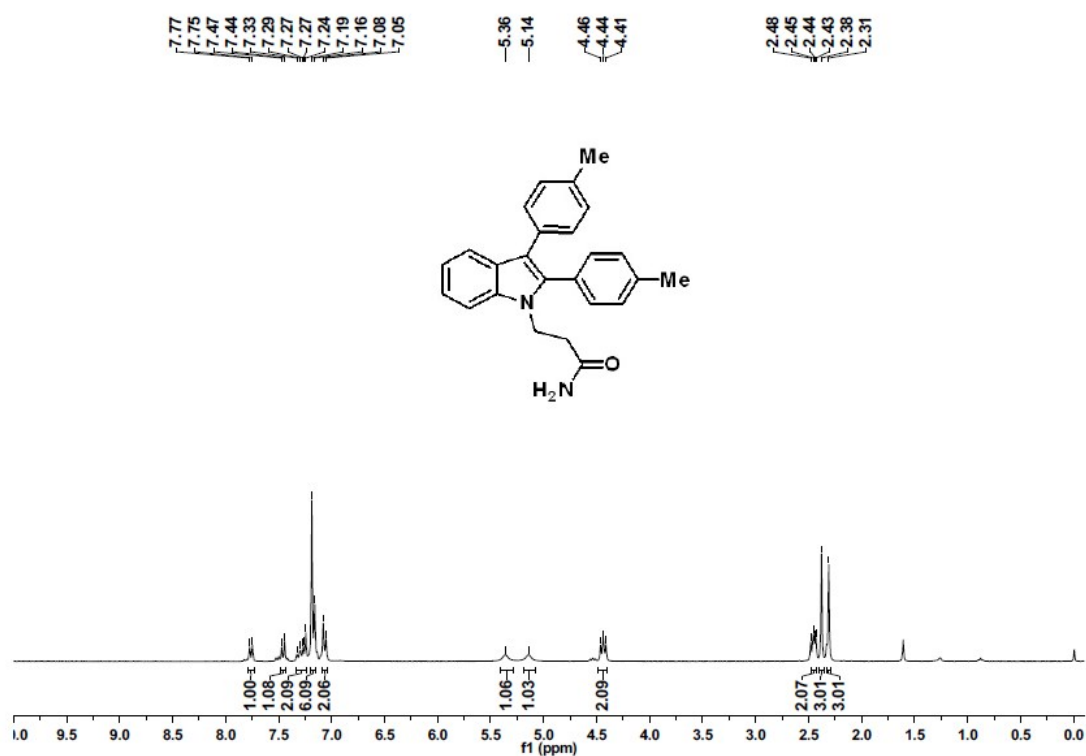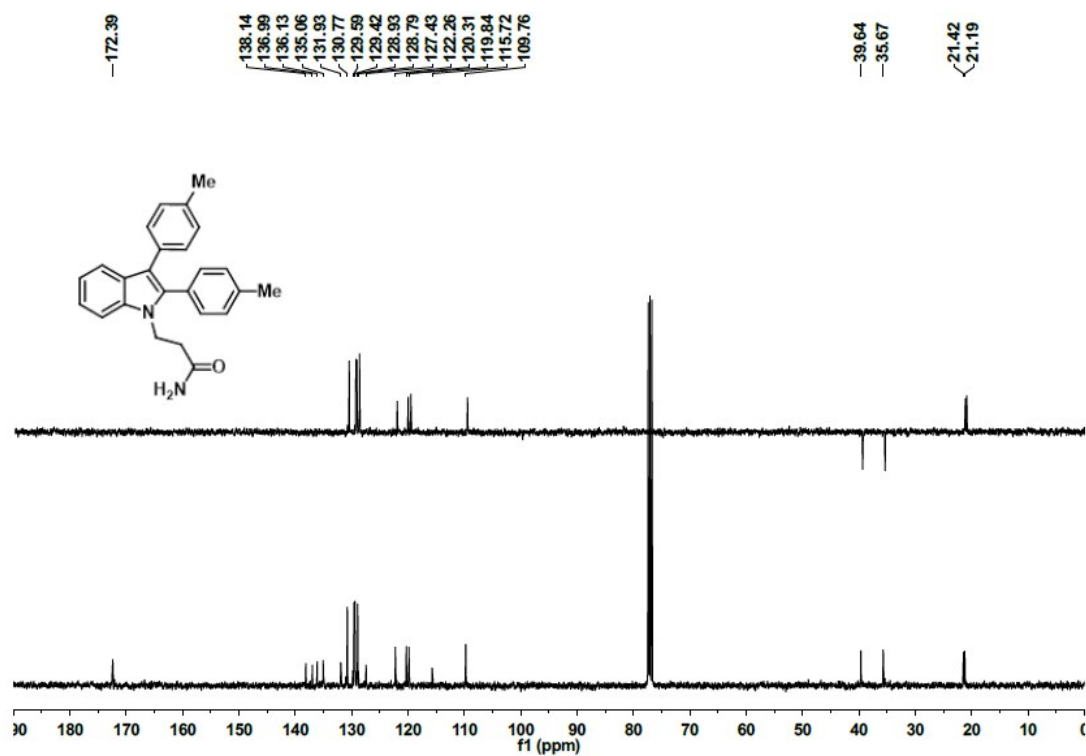

### <sup>1</sup>H and <sup>13</sup>C NMR spectra of compound 3r

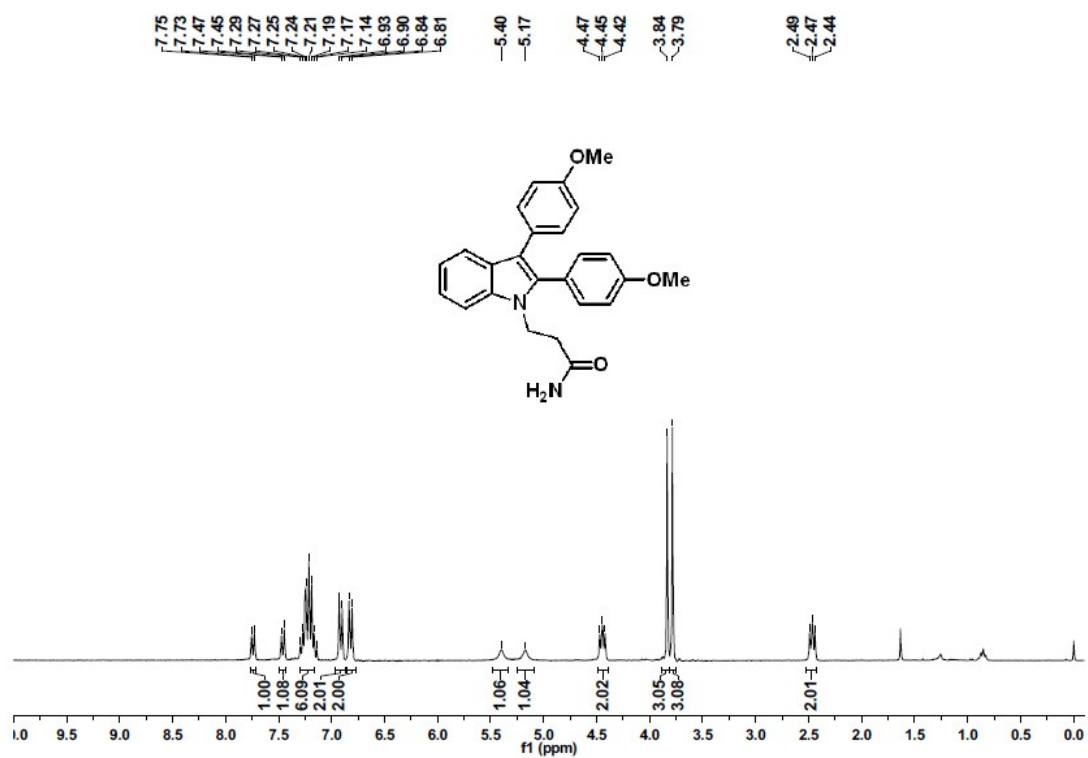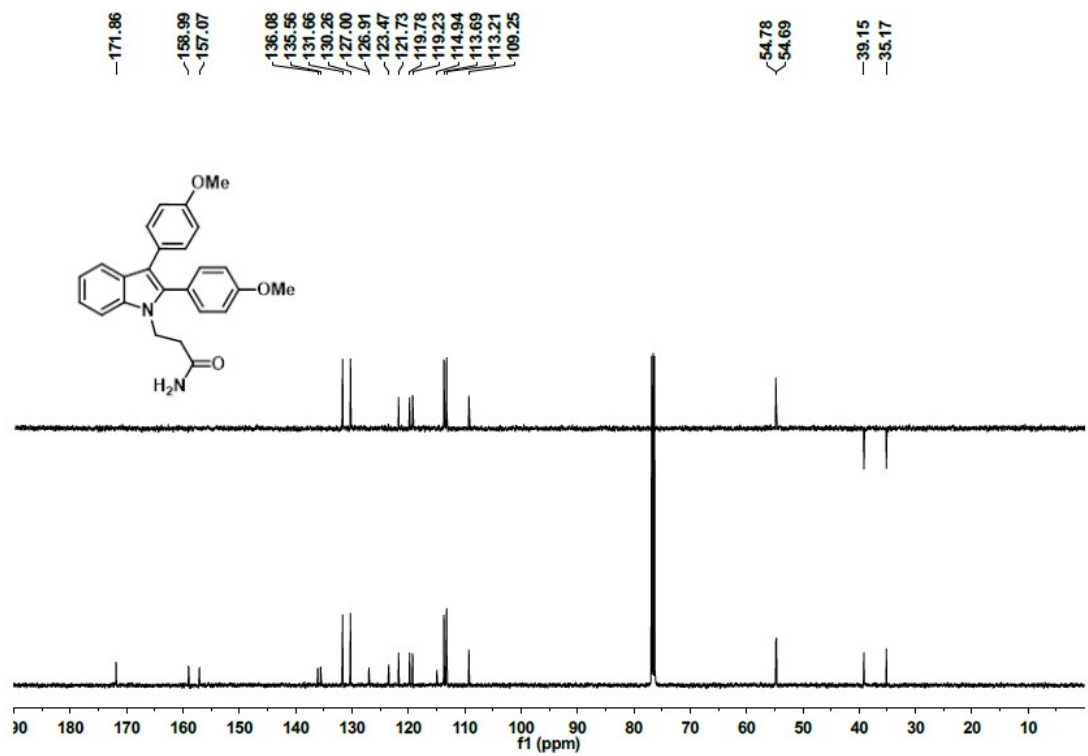

# <sup>1</sup>H and <sup>13</sup>C NMR spectra of compound 3s

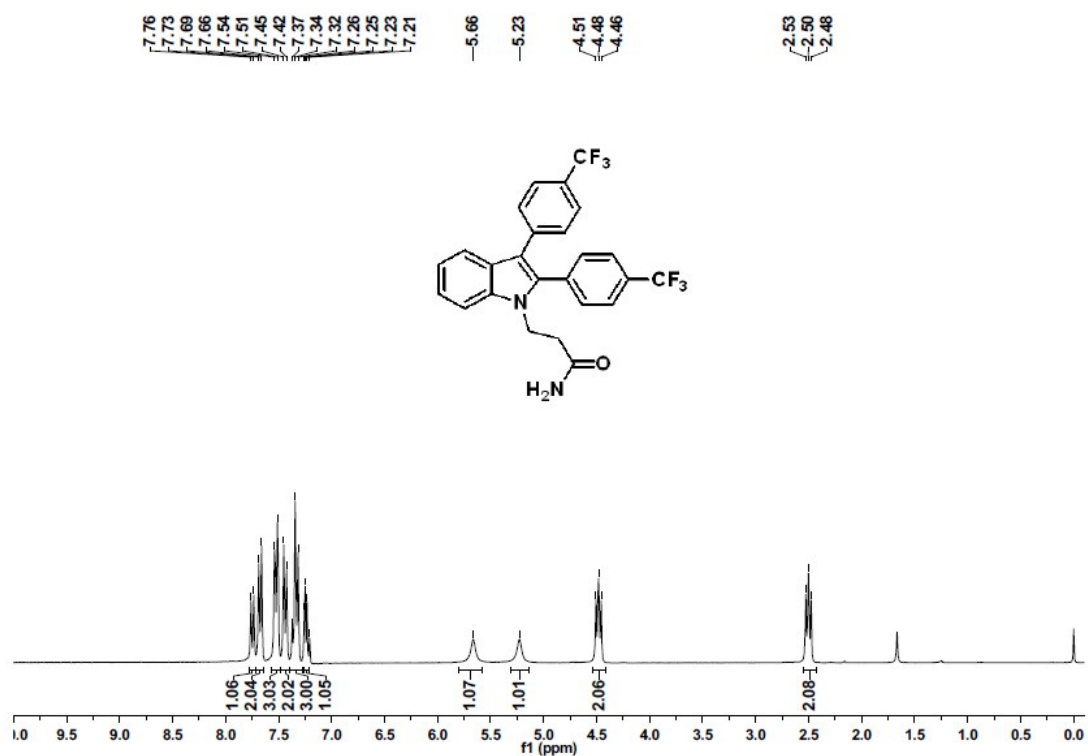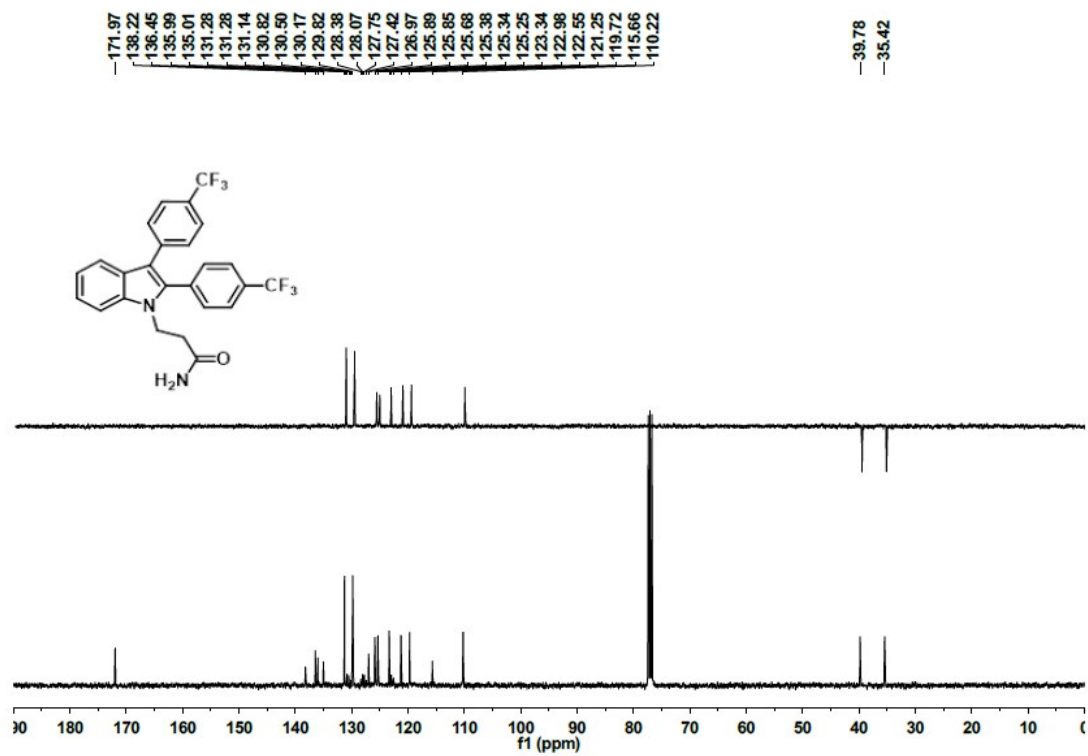

# <sup>1</sup>H and <sup>13</sup>C NMR spectra of compound 3t

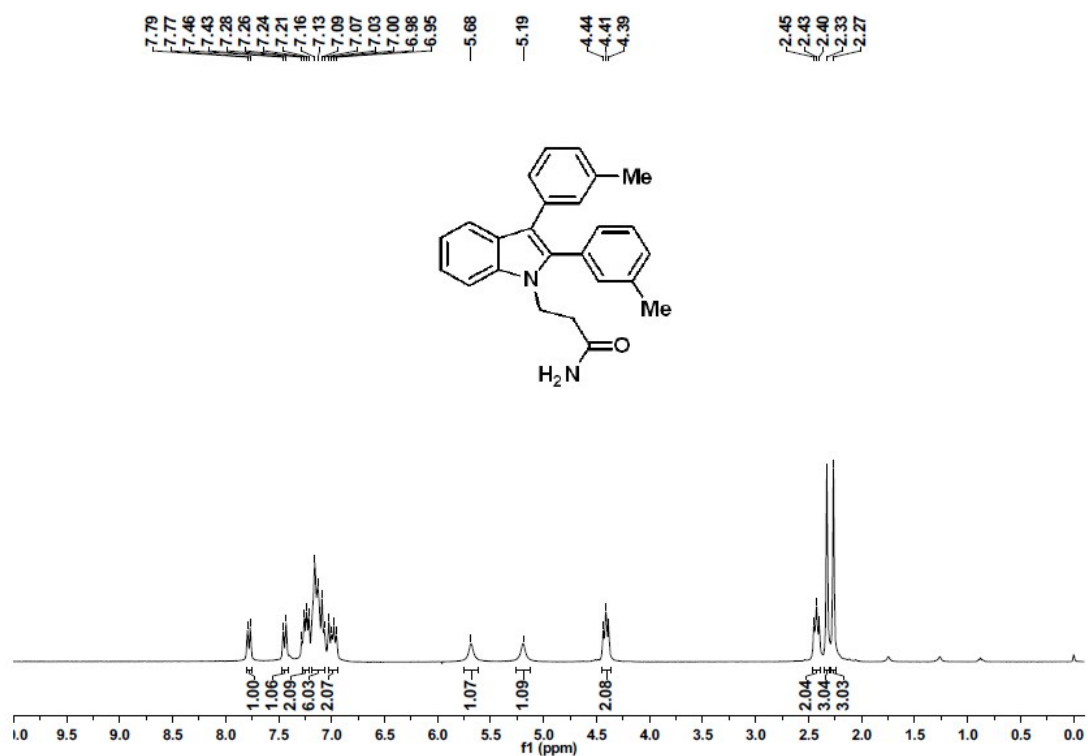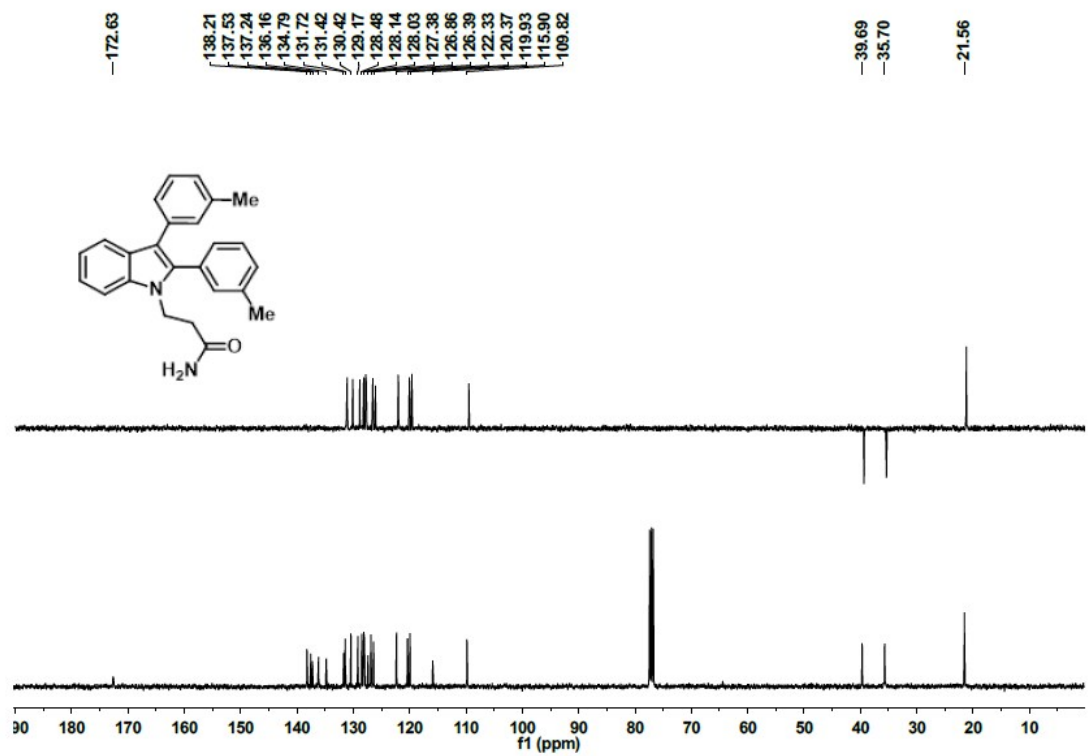

**<sup>1</sup>H and <sup>13</sup>C NMR spectra of compound 3u**

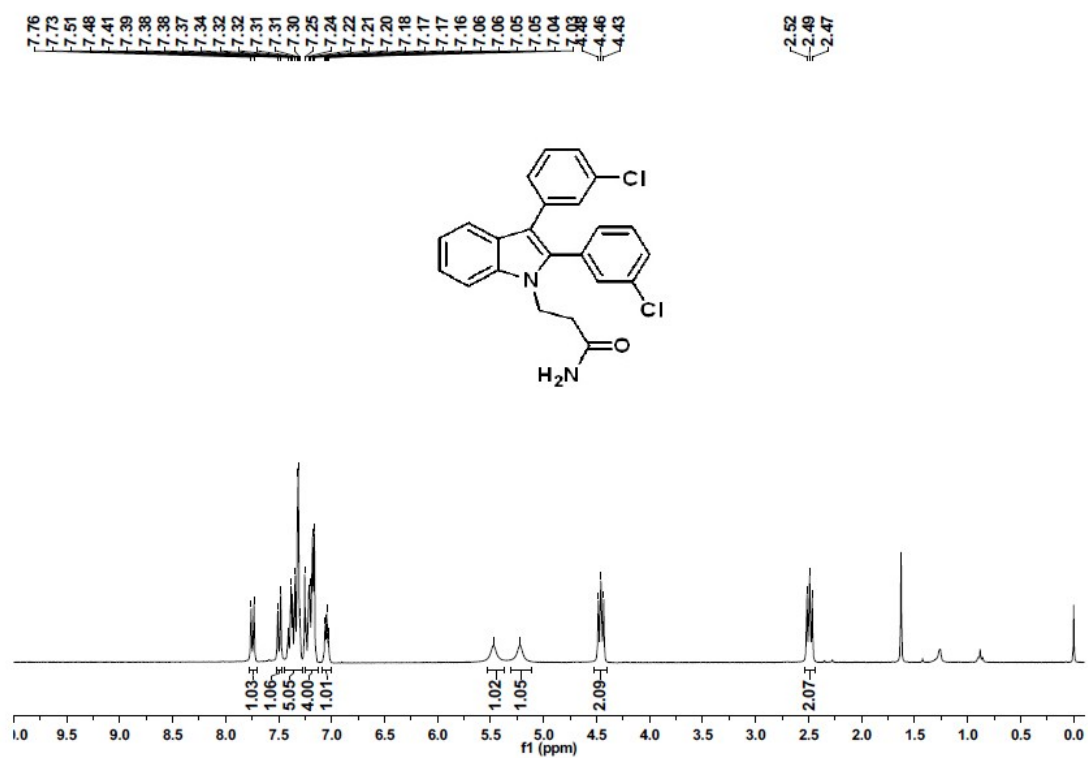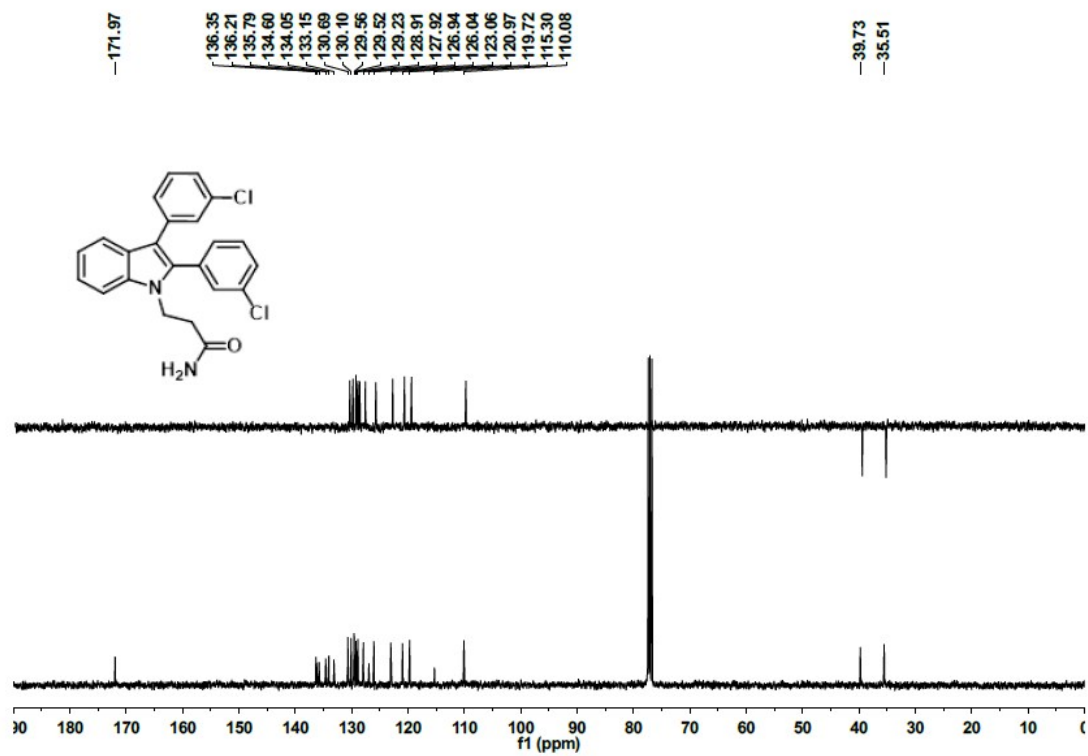

# <sup>1</sup>H and <sup>13</sup>C NMR spectra of compound 3v

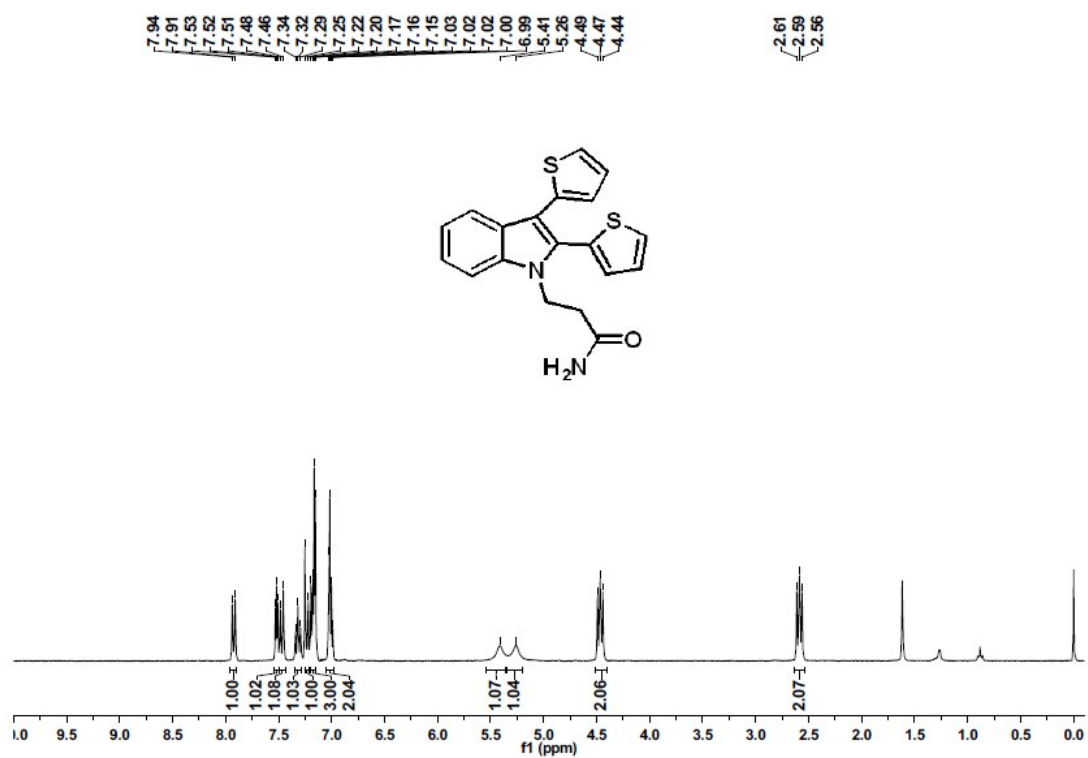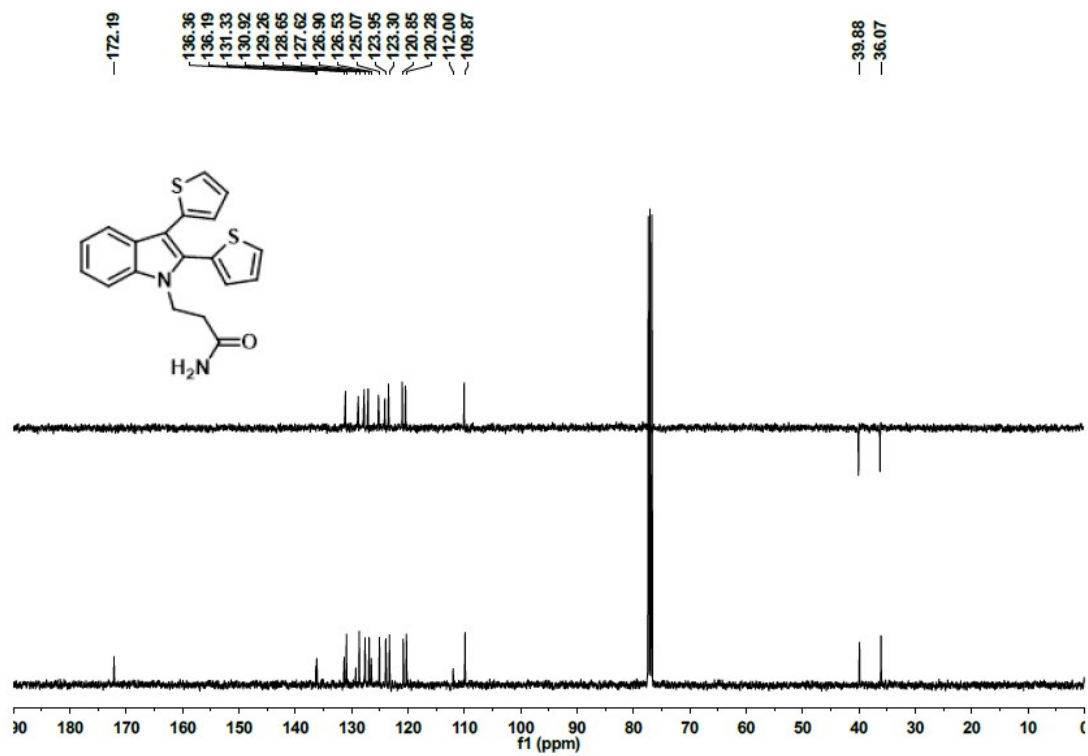



**<sup>1</sup>H and <sup>13</sup>C NMR spectra of compound 3w**

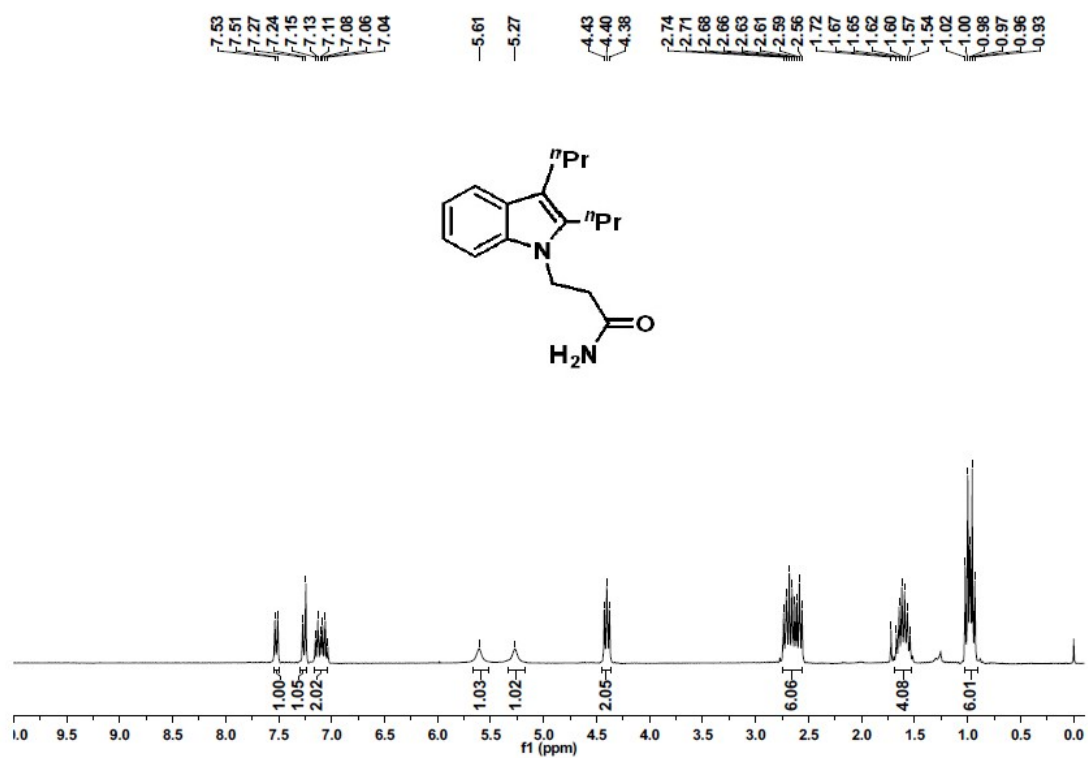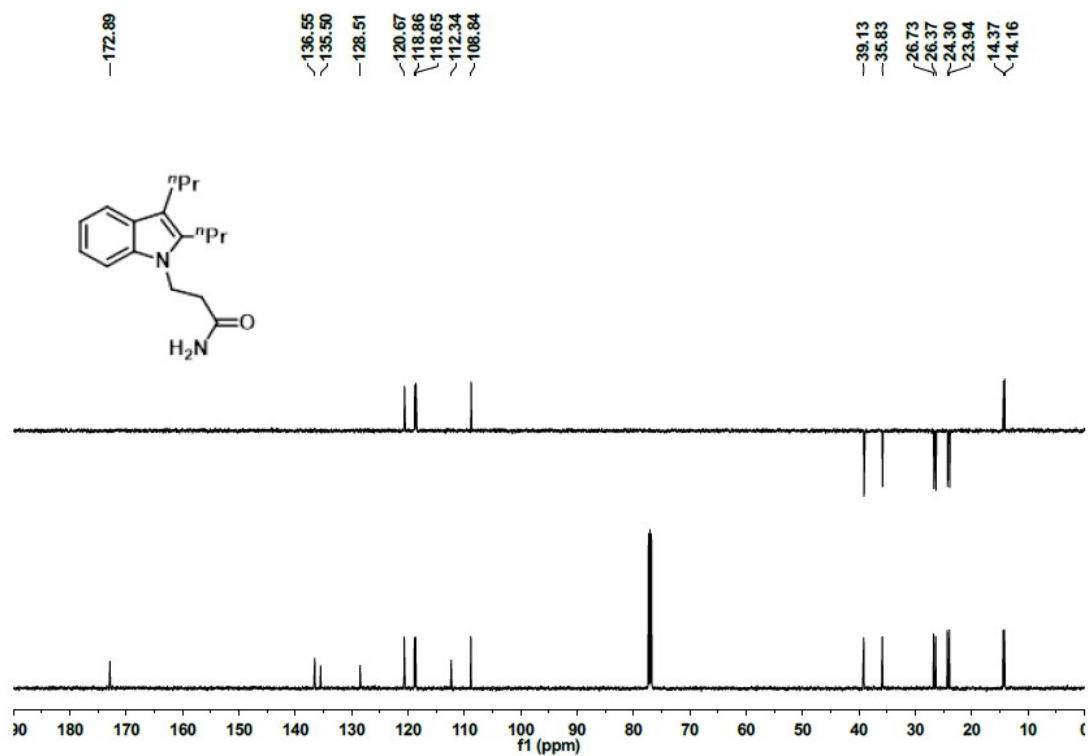

# <sup>1</sup>H and <sup>13</sup>C NMR spectra of compound 3x

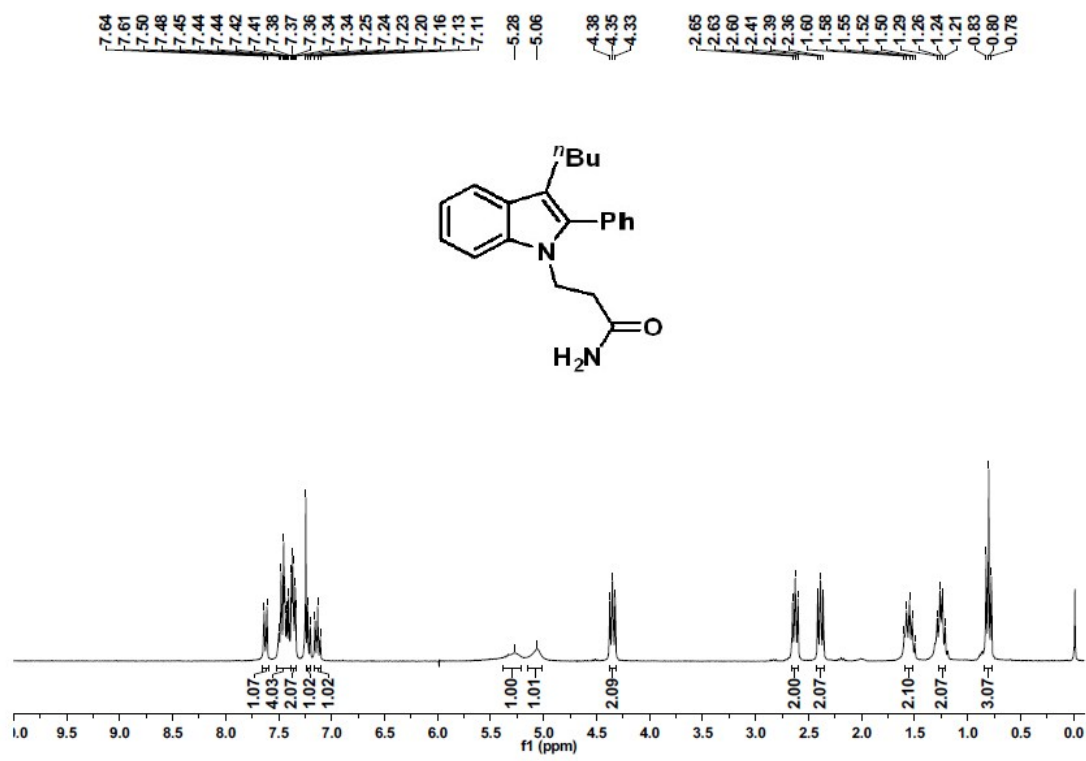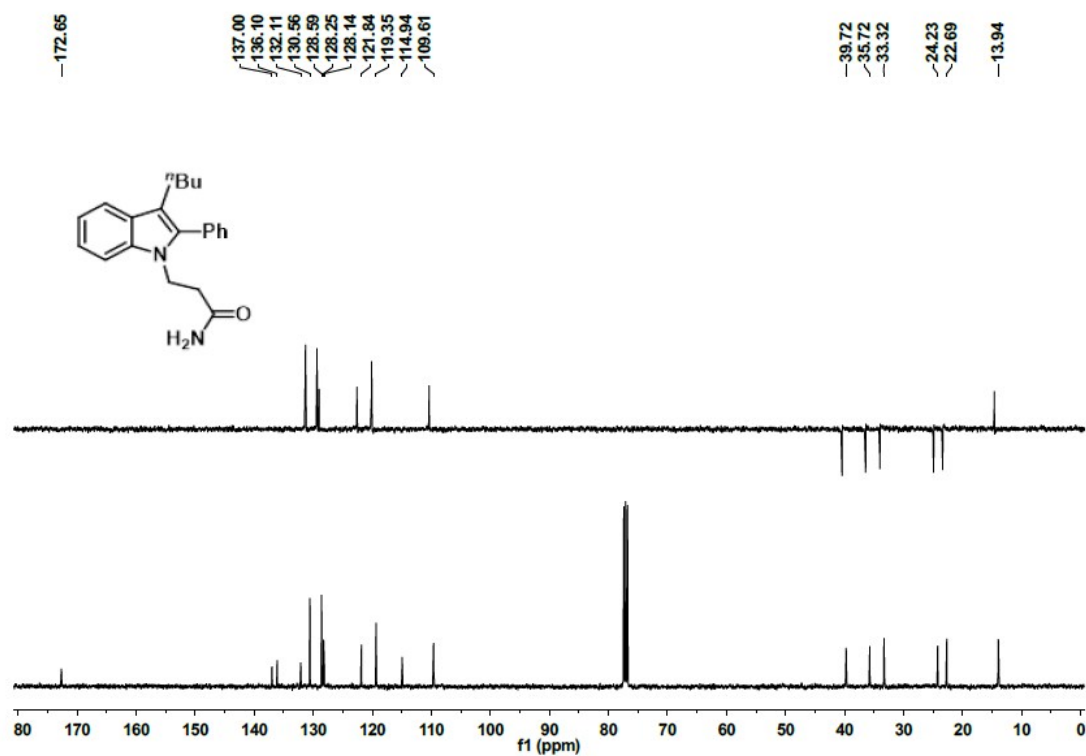

### <sup>1</sup>H and <sup>13</sup>C NMR spectra of compound 3y

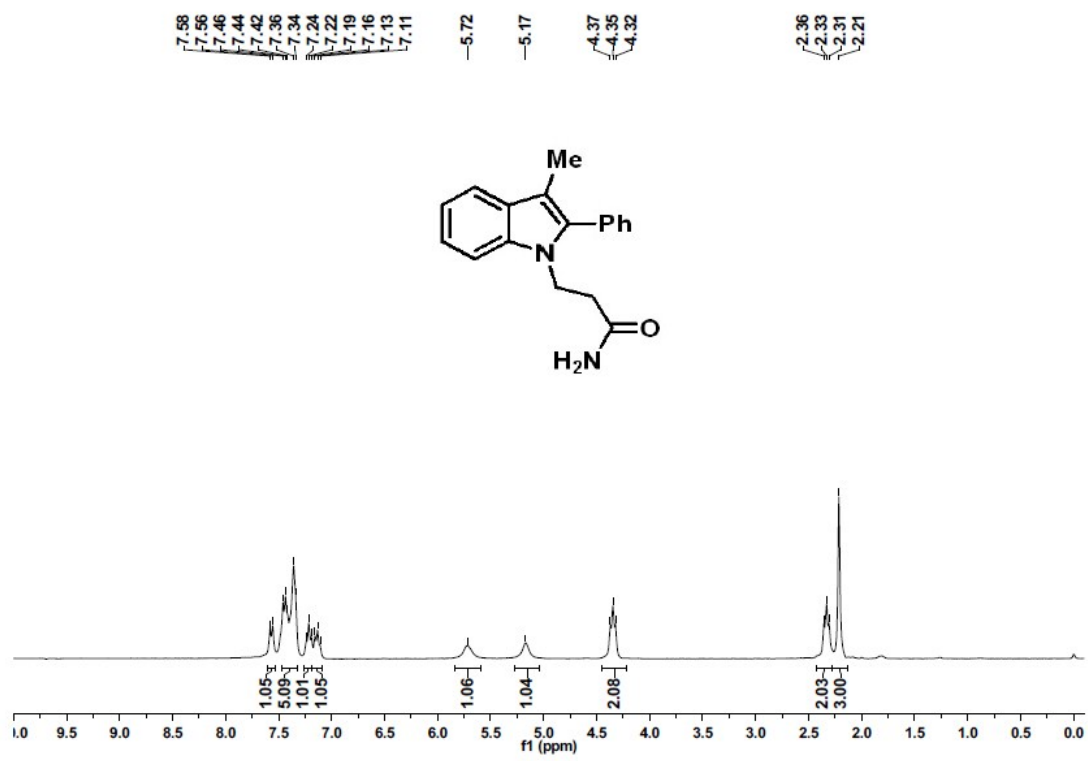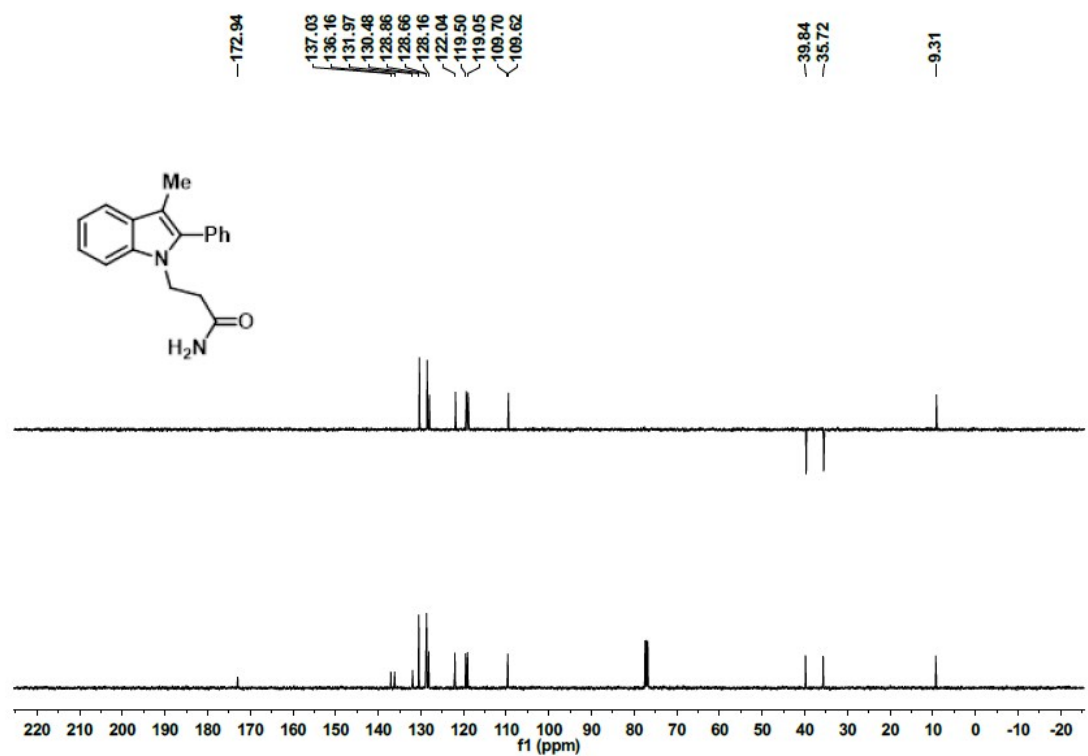

# <sup>1</sup>H and <sup>13</sup>C NMR spectra of compound 3z

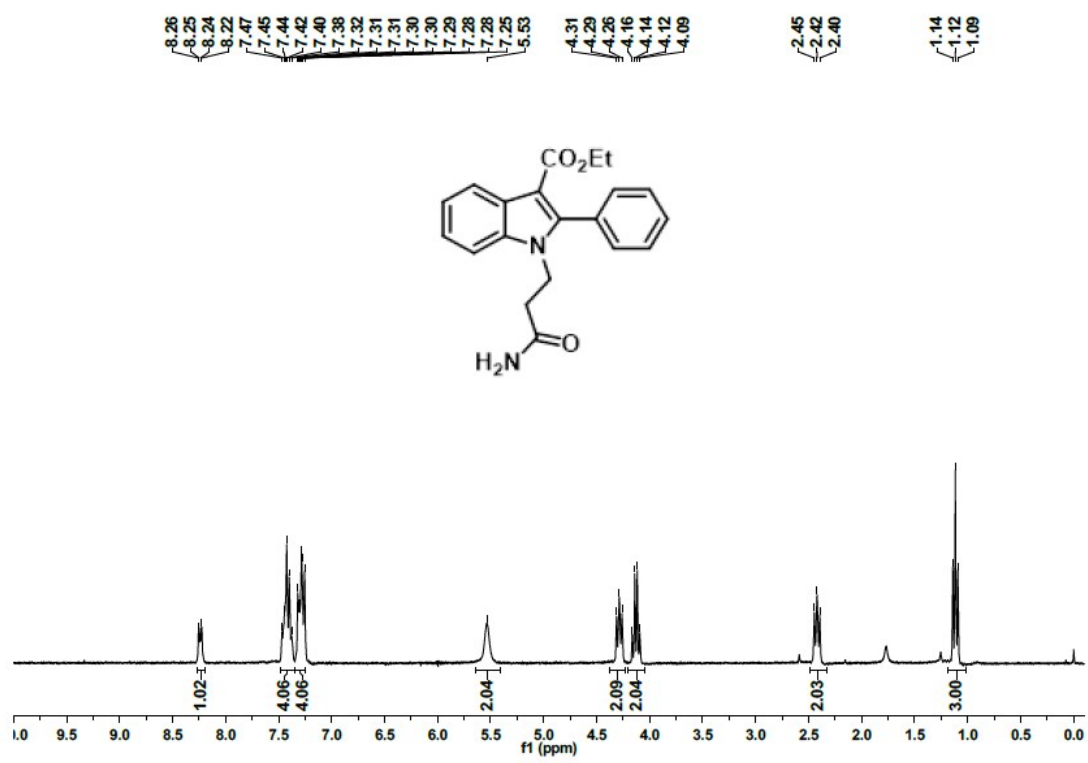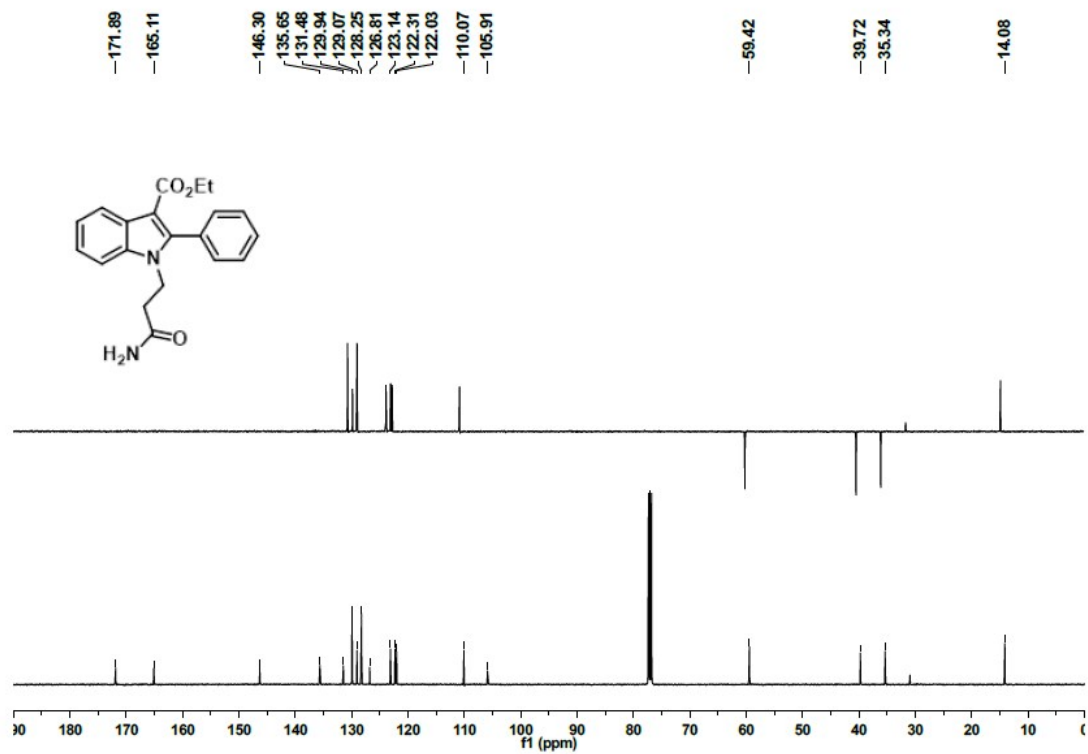

### HMBC of compound 3z

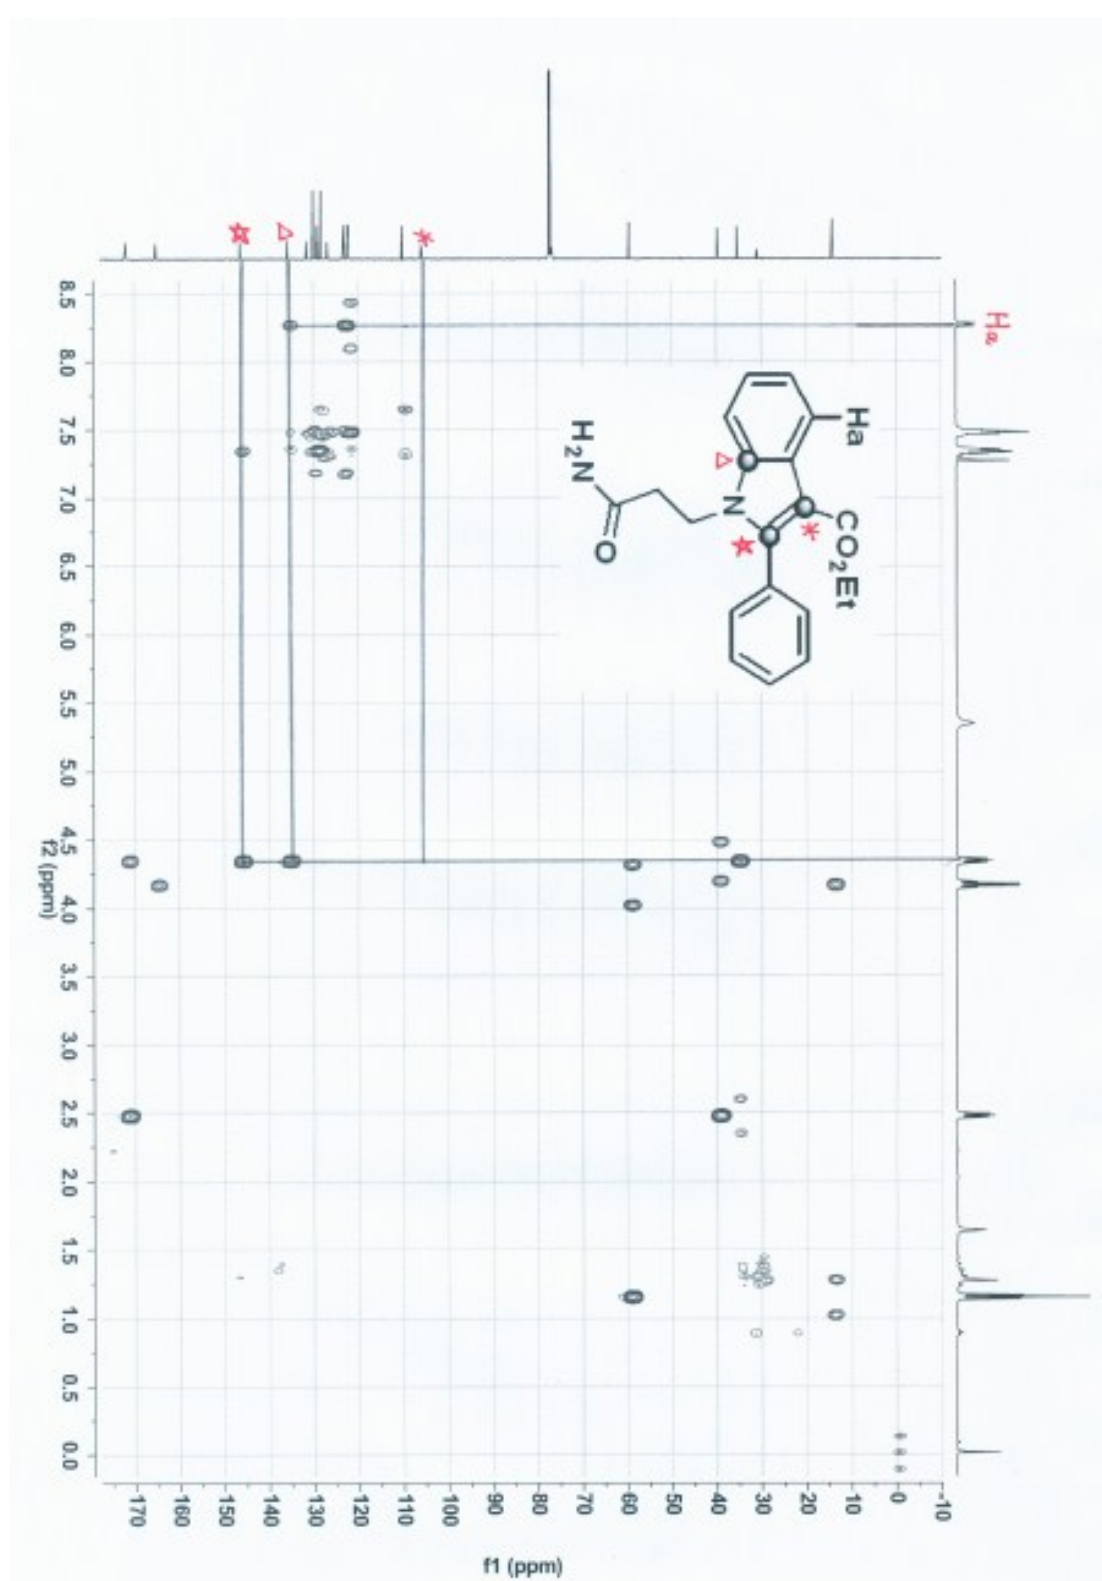

# <sup>1</sup>H and <sup>13</sup>C NMR spectra of compound 3aa

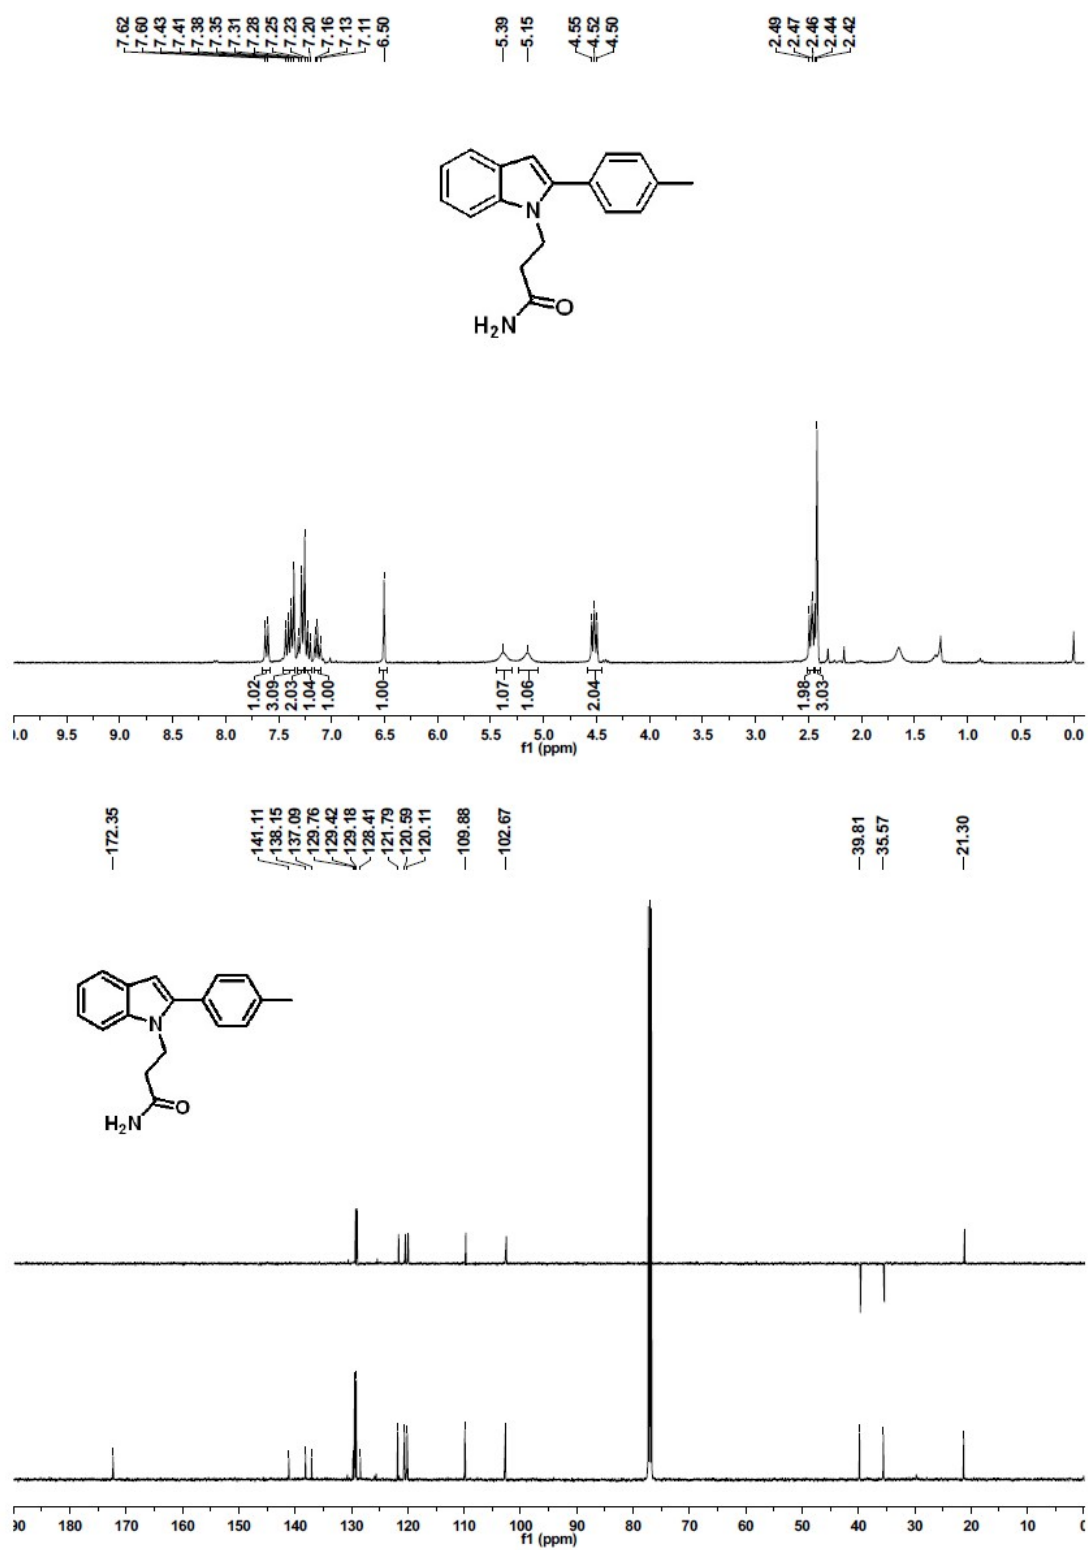

# <sup>1</sup>H and <sup>13</sup>C NMR spectra of compound 3ab

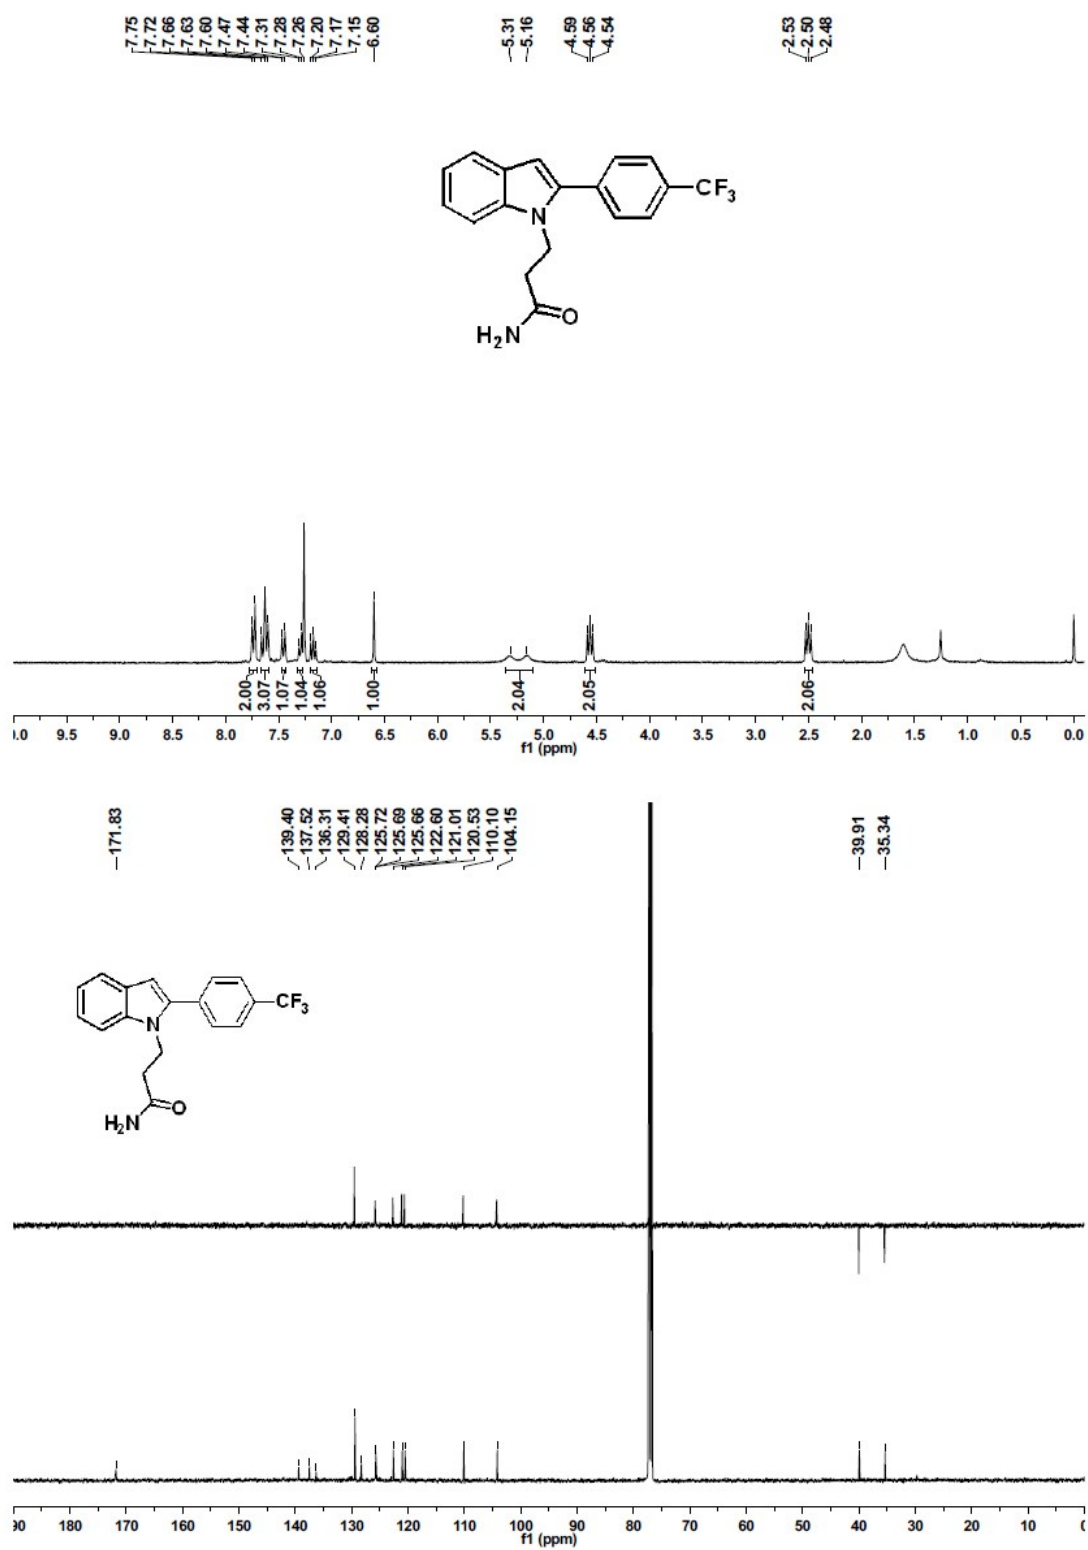

### $^1\text{H}$ and $^{13}\text{C}$ NMR spectra of compound 3ac

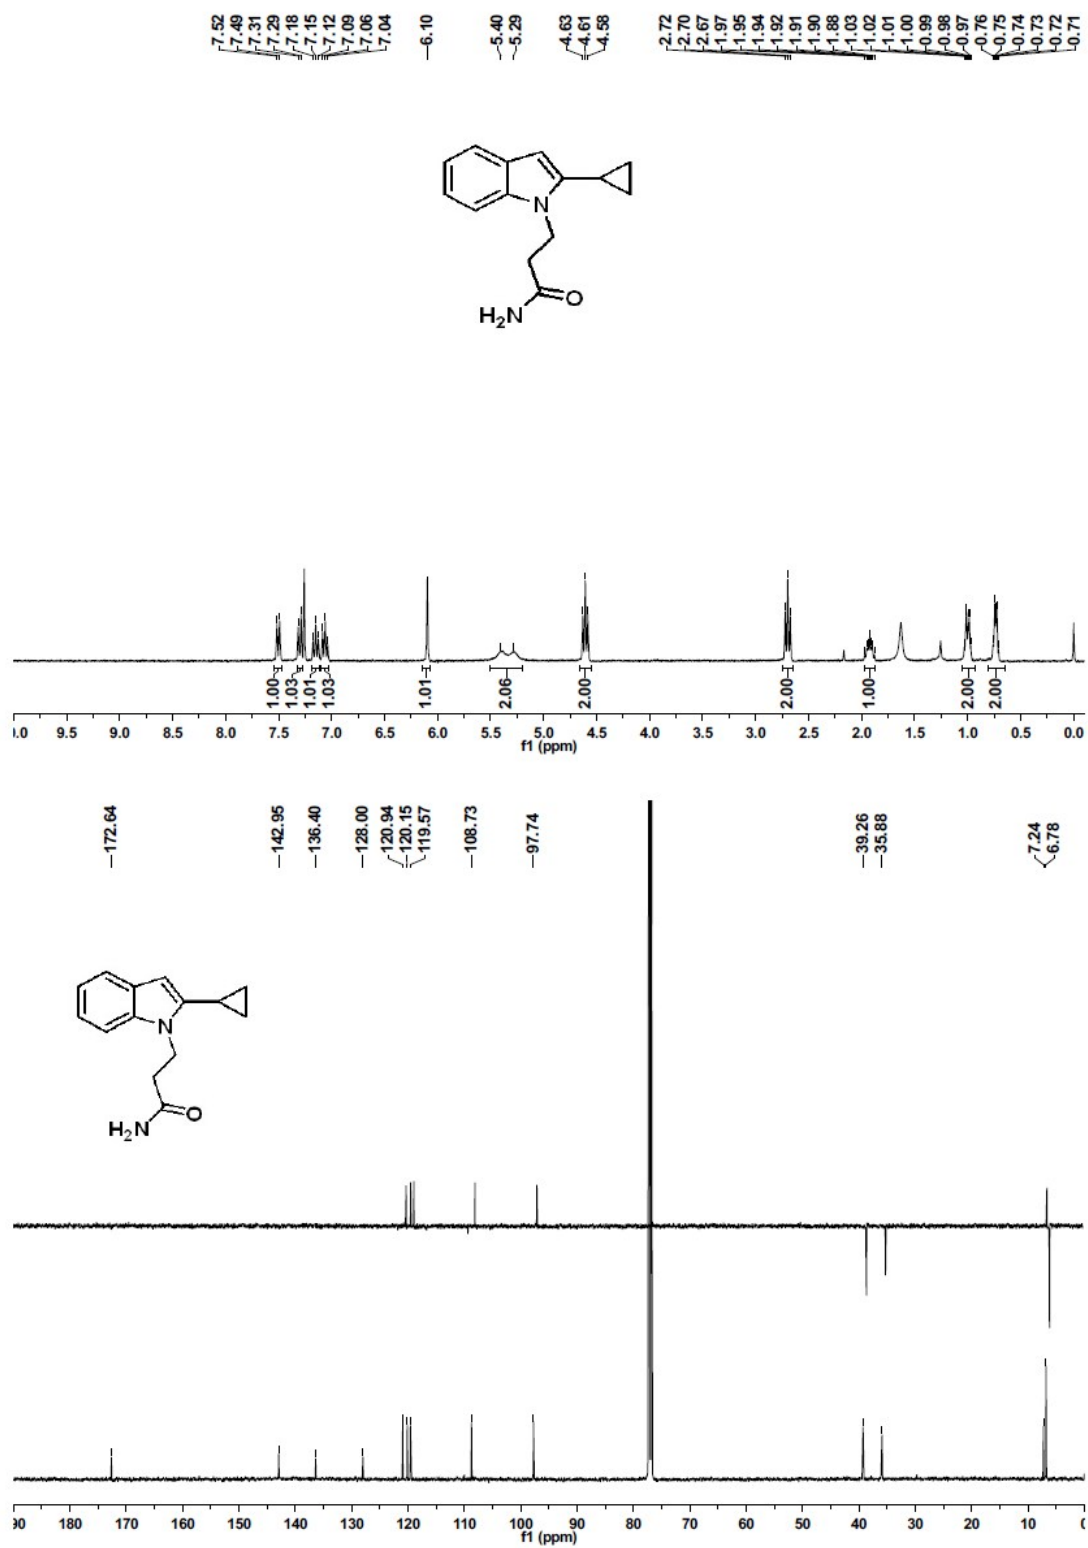



# <sup>1</sup>H and <sup>13</sup>C NMR spectra of compound 3ad

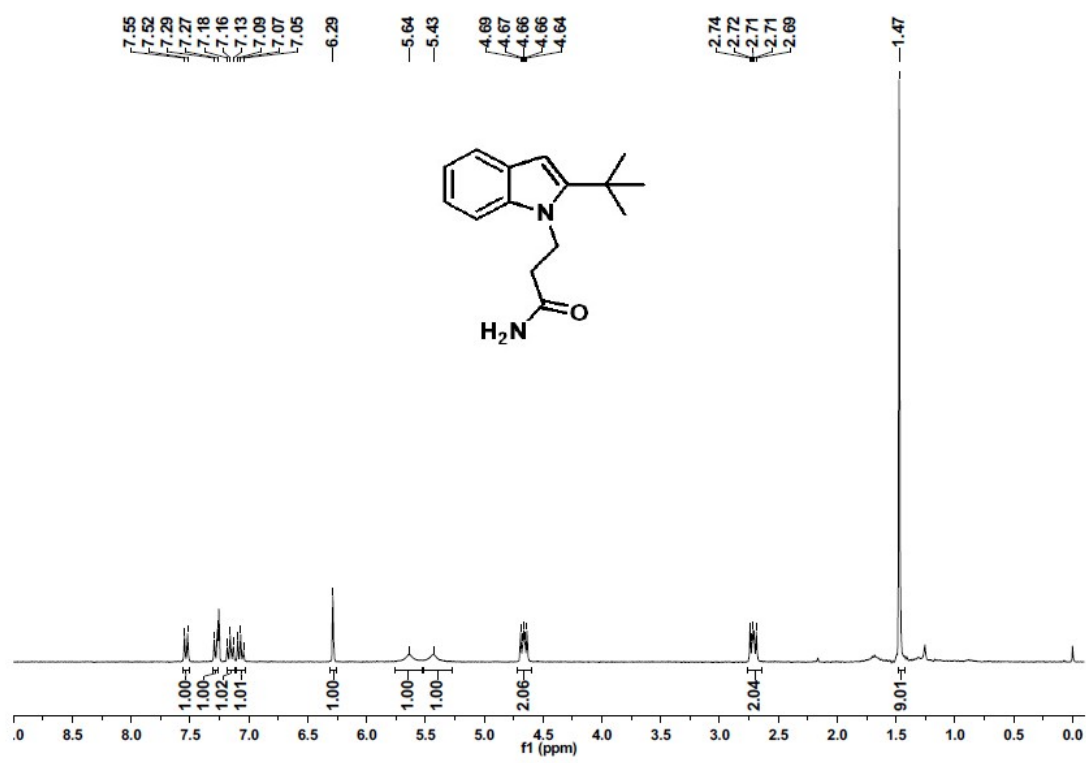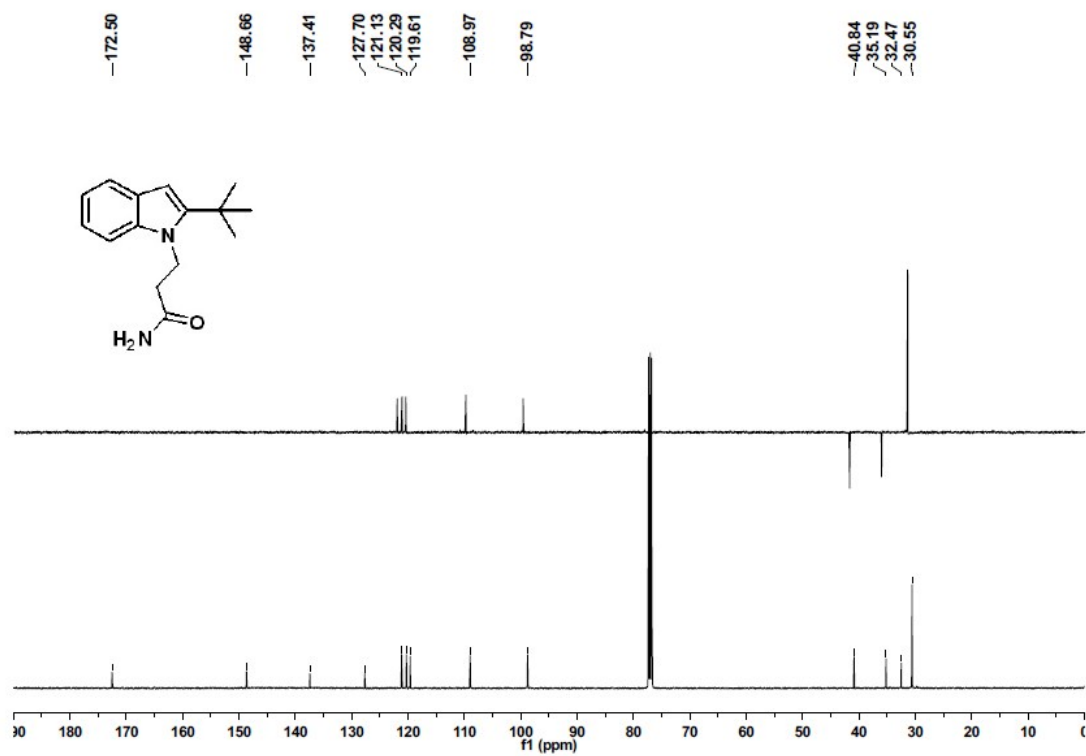

# <sup>1</sup>H and <sup>13</sup>C NMR spectra of compound 4

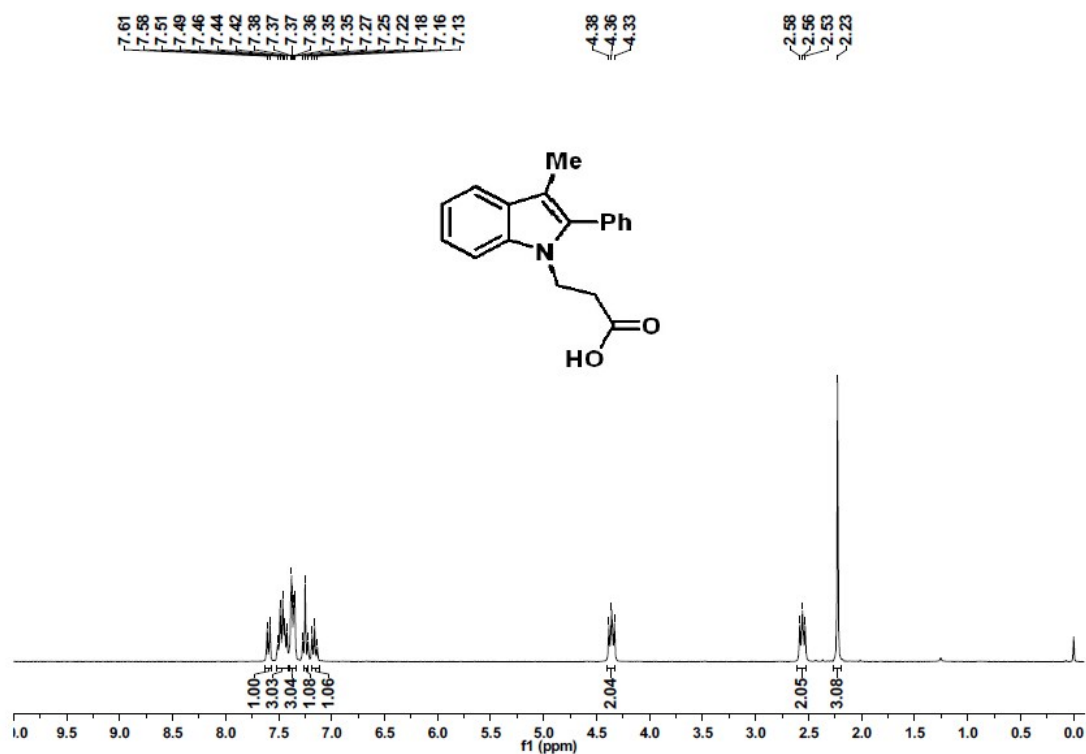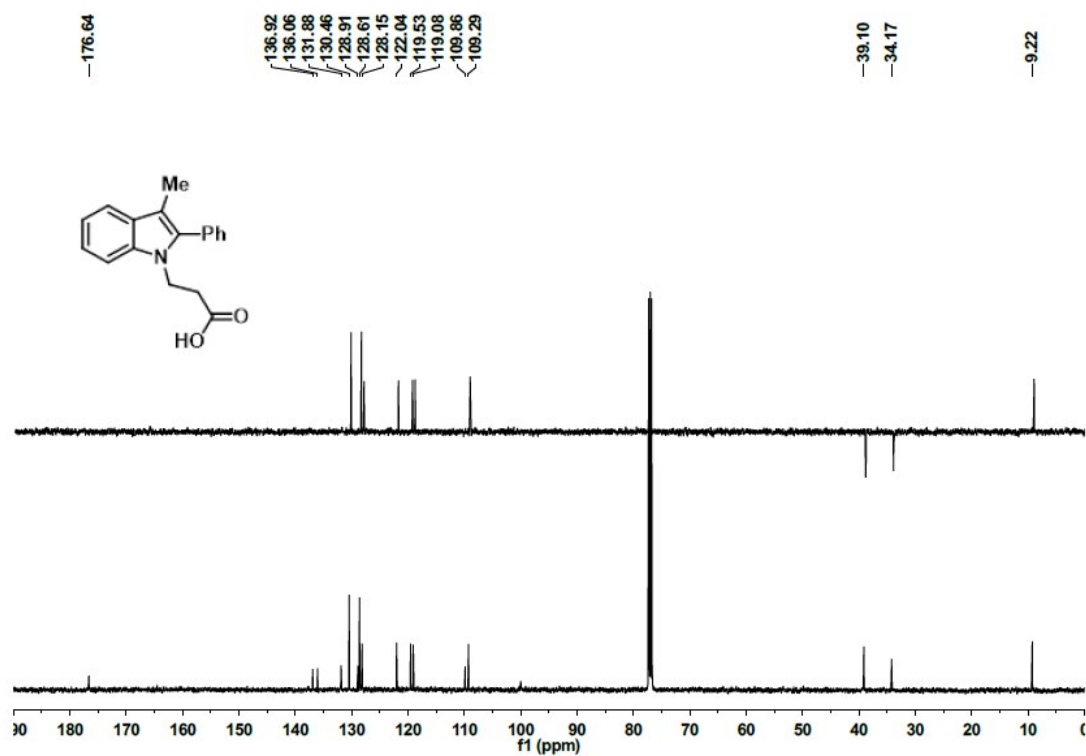

# <sup>1</sup>H and <sup>13</sup>C NMR spectra of compound 5

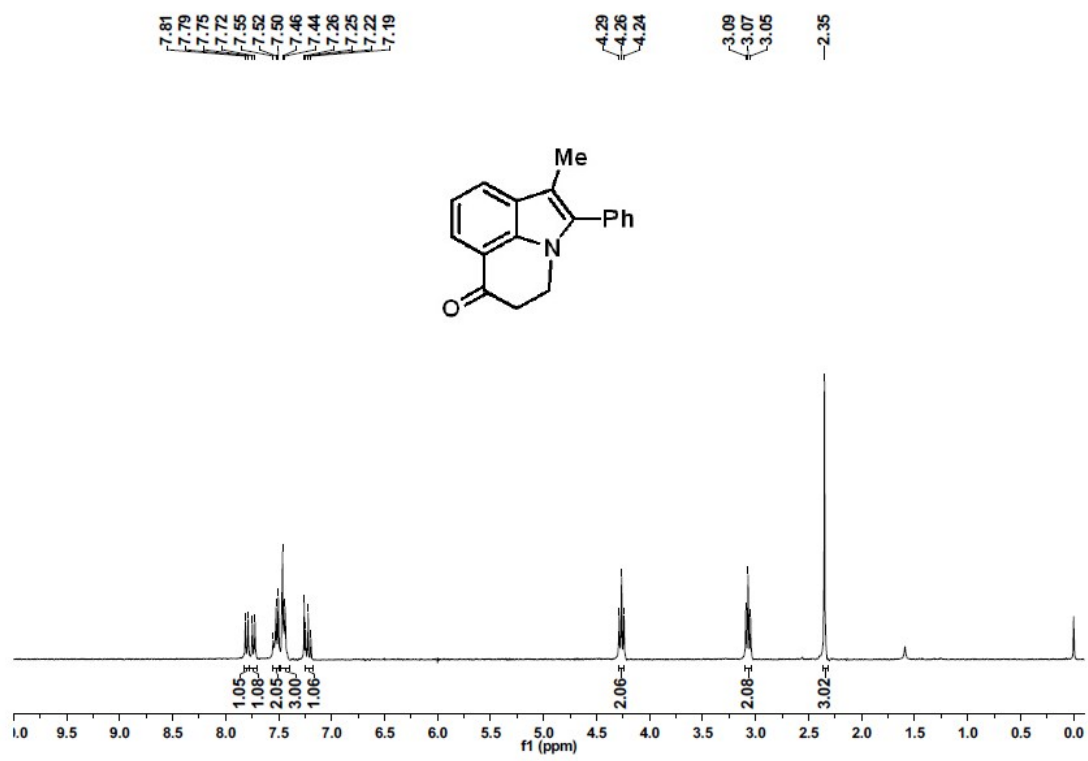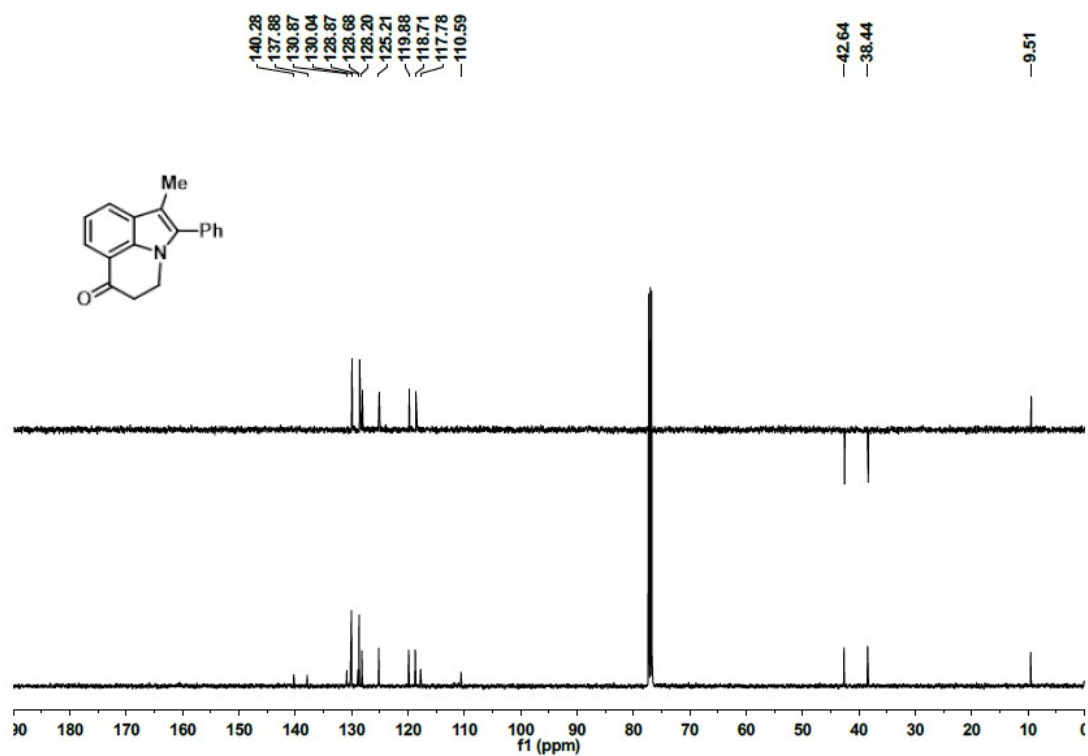

# $^1\text{H}$ and $^{13}\text{C}$ NMR spectra of compound 6

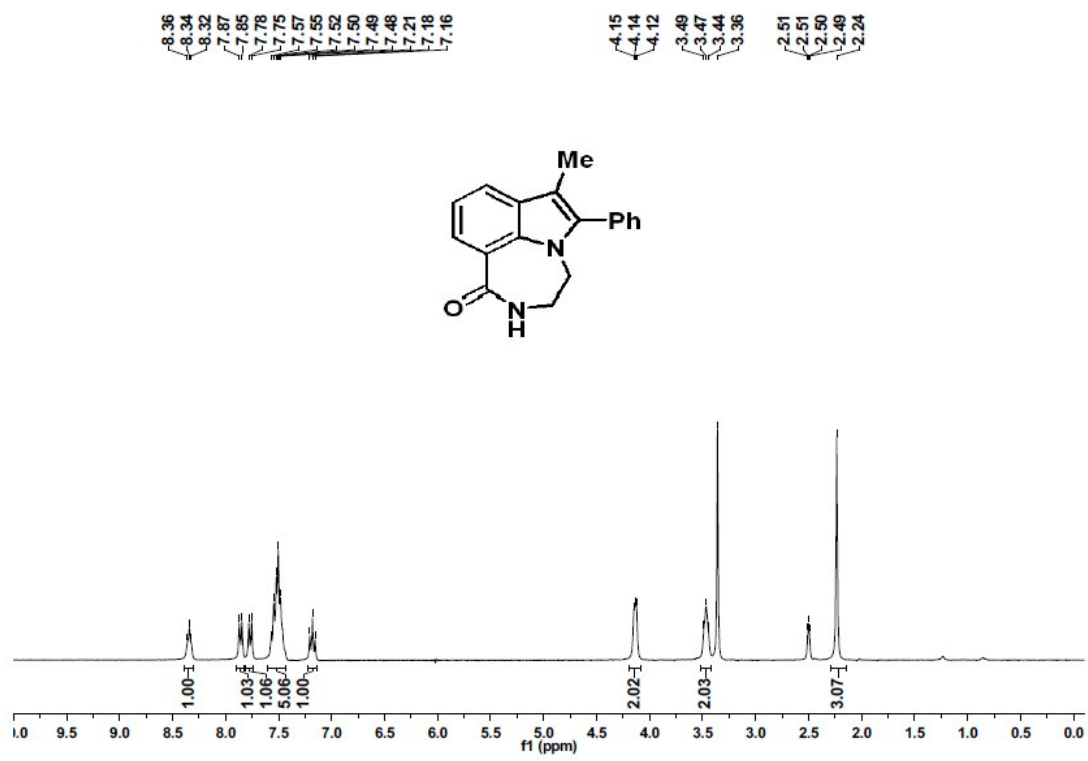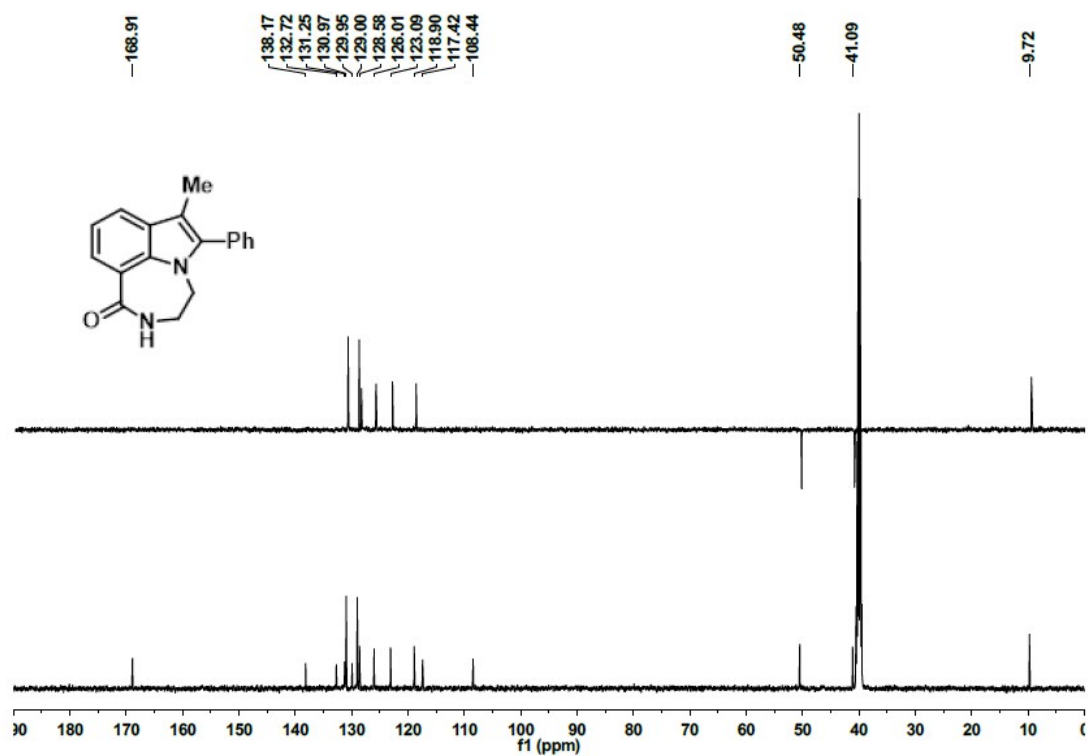

## 2. X-ray structure of compound 3a

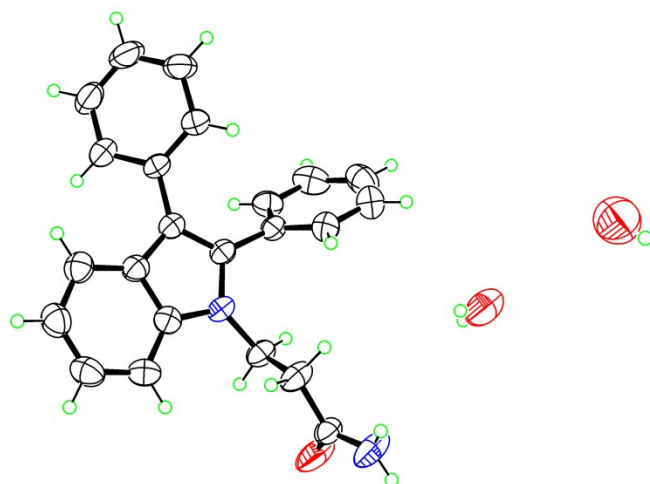

Figure S1. Ortep representation of compound 3a

Table S1. Sample and crystal data for compound 3a

|                        |                                                                                                                                    |
|------------------------|------------------------------------------------------------------------------------------------------------------------------------|
| CCDC                   | 1540588                                                                                                                            |
| Chemical formula       | $C_{23}H_{20}N_2O_{2.50}$                                                                                                          |
| Formula weight         | 364.41                                                                                                                             |
| Temperature            | 296(2) K                                                                                                                           |
| Wavelength             | 0.71073 Å                                                                                                                          |
| Crystal size           | 0.050 x 0.080 x 0.100 mm                                                                                                           |
| Crystal system         | monoclinic                                                                                                                         |
| Space group            | $C 1 2/c 1$                                                                                                                        |
| Unit cell dimensions   | $a = 24.0516(14)$ Å $\alpha = 90^\circ$<br>$b = 8.6236(5)$ Å $\beta = 106.207(3)^\circ$<br>$c = 20.5558(10)$ Å $\gamma = 90^\circ$ |
| Volume                 | $4094.1(4)$ Å <sup>3</sup>                                                                                                         |
| Z                      | 8                                                                                                                                  |
| Density (calculated)   | 1.182 Mg/cm <sup>3</sup>                                                                                                           |
| Absorption coefficient | 0.078 mm <sup>-1</sup>                                                                                                             |
| F(000)                 | 1536                                                                                                                               |

Table S2. Data collection and structure refinement for compound 3a

---

|                                            |                                                                                                                         |
|--------------------------------------------|-------------------------------------------------------------------------------------------------------------------------|
| <b>Theta range for data collection</b>     | 1.76 to 25.00°                                                                                                          |
| <b>Index ranges</b>                        | -25<=h<=28, -10<=k<=10, -24<=l<=24                                                                                      |
| <b>Reflections collected</b>               | 15097                                                                                                                   |
| <b>Independent reflections</b>             | 3602 [R(int) = 0.0283]                                                                                                  |
| <b>Coverage of independent reflections</b> | 99.9%                                                                                                                   |
| <b>Absorption correction</b>               | multi-scan                                                                                                              |
| <b>Structure solution technique</b>        | direct methods                                                                                                          |
| <b>Structure solution program</b>          | SHELXS-97 (Sheldrick, 2008)                                                                                             |
| <b>Refinement method</b>                   | Full-matrix least-squares on F <sup>2</sup>                                                                             |
| <b>Refinement program</b>                  | SHELXL-97 (Sheldrick, 2008)                                                                                             |
| <b>Function minimized</b>                  | $\Sigma w(F_o^2 - F_c^2)^2$                                                                                             |
| <b>Data / restraints / parameters</b>      | 3602 / 8 / 258                                                                                                          |
| <b>Goodness-of-fit on F<sup>2</sup></b>    | 1.751                                                                                                                   |
| <b><math>\Delta/\sigma_{\max}</math></b>   | 2.988                                                                                                                   |
| <b>Final R indices</b>                     | 2662 data; I>2 $\sigma$ (I) R1 = 0.1179, wR2 = 0.3808<br>all data R1 = 0.1386, wR2 = 0.4087                             |
| <b>Weighting scheme</b>                    | w=1/[ $\sigma^2(F_o^2)+(0.2000P)^2+0.0000P$ ]<br>where P=(F <sub>o</sub> <sup>2</sup> +2F <sub>c</sub> <sup>2</sup> )/3 |
| <b>Extinction coefficient</b>              | 0.0110(30)                                                                                                              |
| <b>Largest diff. peak and hole</b>         | 1.808 and -0.506 eÅ <sup>-3</sup>                                                                                       |
| <b>R.M.S. deviation from mean</b>          | 0.131 eÅ <sup>-3</sup>                                                                                                  |

---
